1 PLASTID OSMOTIC STRESS INFLUENCES CELL DIFFERENTIATION AT THE PLANT SHOOT  
2 APEX

3

4 Margaret E. Wilson<sup>1</sup>, Matthew Mixdorf<sup>1</sup>, R. Howard Berg<sup>2</sup> and Elizabeth S. Haswell<sup>1\*</sup>

5

6 <sup>1</sup>Department of Biology, Mailbox 1137, One Brookings Drive, Washington University in Saint Louis,  
7 Saint Louis, MO, USA 63130

8 <sup>2</sup>Donald Danforth Plant Science Center, 975 North Warson Rd., Saint Louis, MO, USA 63132

9

10 \*Corresponding author

# **RUNNING TITLE**

## **PLASTID STRESS AND CALLUS**

### **SUMMARY STATEMENT**

Plastid osmotic stress influences differentiation at the plant shoot apex. Two established mechanisms that control proliferation, the cytokinin/WUSCHEL stem cell identity loop and a plastid-to-nucleus signaling pathway, are implicated.

### **ABSTRACT**

The balance between proliferation and differentiation in the plant shoot apical meristem is controlled by regulatory loops involving the phytohormone cytokinin and stem cell identity genes. Concurrently, cellular differentiation in the developing shoot is coordinated with the environmental and developmental status of plastids within those cells. Here we employ an *Arabidopsis thaliana* mutant exhibiting constitutive plastid osmotic stress to investigate the molecular and genetic pathways connecting plastid osmotic stress with cell differentiation at the shoot apex. *msl2 msl3* mutants exhibit dramatically enlarged and deformed plastids in the shoot apical meristem, and develop a mass of callus tissue at the shoot apex. Callus production in this mutant requires the cytokinin receptor AHK2 and is characterized by increased cytokinin levels, down-regulation of cytokinin signaling inhibitors ARR7 and ARR15, and induction of the stem cell identity gene *WUSCHEL*. Furthermore, plastid stress-induced apical callus production requires elevated plastidic ROS, ABA biosynthesis, the retrograde signaling protein GUN1, and ABI4. These results are consistent with a model wherein the cytokinin/WUS pathway and retrograde signaling control cell differentiation at the shoot apex.

## INTRODUCTION

The development of land plants provides a unique opportunity to study how cell differentiation is determined, as plant cell identity is highly plastic (Gaillochet and Lohmann, 2015). A classic illustration of plant cell pluripotency is the ability to produce a mass of undifferentiated cells referred to as callus. In nature, callus production is triggered by wounding or exposure to pathogens (Ikeuchi et al., 2013). In the laboratory, callus is typically induced by exogenous treatment with two phytohormones, cytokinin (CK) and auxin (Skoog and Miller, 1957).

Callus is frequently derived from meristem or meristem-like cells (Jiang et al., 2015; Sugimoto et al., 2011). Meristems are small self-renewing pools of undifferentiated cells from which new organs are derived as the plant grows (Aichinger et al., 2012; Gaillochet and Lohmann, 2015). Above ground, the maintenance and regulation of the shoot apical meristem (SAM) is critical for the proper specification and positioning of leaves (Barton, 2010). SAM identity requires both the imposition of stem cell fate by the WUSCHEL(WUS)/CLAVATA(CLV) signaling circuit (Fletcher et al., 1999; Schoof et al., 2000) and the suppression of differentiation by SHOOTMERISTEMLESS (STM) (Endrizzi et al., 1996; Long et al., 1996).

CK plays a key role in the function of the SAM. In the central zone (CZ), CK promotes proliferation, while auxin promotes differentiation in the peripheral zone (PZ) (Schaller et al., 2015). Localized CK perception and response specifies the organizing center of the SAM, also the region of *WUS* expression (Chickarmane et al., 2012; Gordon et al., 2009; Zurcher et al., 2013). *WUS* activity maintains itself through a positive feedback loop involving CK response via Type-A Arabidopsis Response Regulators (ARRs), key negative regulators of CK signaling (Leibfried et al., 2005; Schuster et al., 2014; To et al., 2007; Zhao et al., 2010). In the SAM, auxin acts to repress *ARR7* and *ARR15*, (Zhao et al., 2010). Thus, auxin and CK synergize to regulate the core *WUS/CLV* pathway, maintaining a balance between differentiation and proliferation in the SAM (Gaillochet and Lohmann, 2015; Ikeuchi et al., 2013).

Shoot development also depends on plastids, endosymbiotic organelles responsible for photosynthesis, amino acid, starch, and fatty acid biosynthesis and the production of many hormones and secondary metabolites (Neuhaus and Emes, 2000). As cells leave the SAM and take on the appropriate cell identity within leaf primordia, the small, undifferentiated plastids, called proplastids, inside them must also differentiate, usually into chloroplasts. Many mutants lacking functional plastid-

localized proteins exhibit secondary defects in leaf cell specification ((Larkin, 2014; Luesse et al., 2015; Moschopoulos et al., 2012), providing genetic evidence that normal leaf development depends upon plastid homeostasis. The integration of plastid differentiation into the process of development likely requires tightly regulated and finely tuned two-way communication between the plastid and the nucleus, including both anterograde (nucleus-to-plastid) and retrograde (plastid-to-nucleus) signaling. An increasing number of overlapping retrograde signaling pathways, triggered by developmental or environmental defects in plastid function, have been identified (Chan et al., 2015; Woodson and Chory, 2012). Numerous retrograde signals have been proposed, including intermediates in isoprenoid (Xiao et al., 2012) biosynthesis, heme (Woodson et al., 2011), phosphonucleotides (Estavillo et al., 2011), reactive oxygen species (ROS) (Wagner et al., 2004) and oxidized carotenoids (Ramel et al., 2012). Despite the diversity, all these pathways and signals link a disruption in plastid homeostasis to altered nuclear gene expression (Chan et al., 2015).

One retrograde signaling pathway that may serve to connect plastid signals to shoot development is the GENOMES UNCOUPLED (GUN1) / ABA-INSENSITIVE 4 (ABI4) pathway (Fernandez and Strand, 2008; Leon et al., 2012). ABI4 is a nuclear transcription factor involved in many plant developmental pathways, including response to ABA, sugar signaling, and mitochondrial retrograde signaling (Leon et al., 2012). GUN1 is a plastid protein of unclear molecular function thought to function with ABI4 in at least two retrograde signaling pathways, one that coordinates plastid and nuclear gene expression during development, and one that respond to defects in chlorophyll biosynthesis (Cottage et al., 2010; Koussevitzky et al., 2007; Sun et al., 2011).

We have been using an Arabidopsis mutant with constitutively osmotically stressed plastids (*msl2 msl3* (Veley et al., 2012)) as a model system to address the developmental effects of plastid dysfunction. MSL2 and MSL3 are two members of the MscS-Like family of mechanosensitive ion channels that localize to the plastid envelope and are required for normal plastid size, shape, and division site selection (Haswell and Meyerowitz, 2006; Wilson et al., 2011). By analogy to family members in bacteria (Levina et al., 1999) and plants (Hamilton et al., 2015), and based on *in vivo* experiments (Veley et al., 2012), MSL2 and MSL3 are likely to serve as osmotic “safety valves”, allowing plastids to continuously maintain osmotic homeostasis during normal growth and development. In addition, *msl2 msl3* mutant plants exhibit small stature, variegated leaf color, and ruffled leaf margins. These whole-plant defects can be attributed to plastid osmotic stress, as they are suppressed by environmental and genetic manipulations that increase cytoplasmic osmolarity and draw water out of the plastid (Veley et al., 2012; Wilson et al., 2014). Here we report a new and

104 unexpected phenotype associated with *msl2 msl3* mutants, and establish the molecular and genetic  
105 pathways that underlie it.

## RESULTS

### ***msl2 msl3* double mutants develop callus at the shoot apex**

When grown on solid media for over 14 days, *msl2 msl3* double mutant plants developed a proliferating mass of undifferentiated cells, or callus, at the apex of the plant (Fig. 1A-D). A single mass at the center of the apex, twin masses associated with the cotyledon petioles, or occasionally three masses were observed (Fig. 1A-C). New green tissue was frequently observed growing out of the apical callus (white arrow, Fig. 1D). This phenotype was not observed in soil-grown plants.

Masses of callus tissue were apparent to the naked eye at the apex of *msl2 msl3* seedlings between 14 and 16 days after germination (DAG) and continued to grow in size through 22 DAG (Fig. 1E, top two rows). As previously documented (Haswell and Meyerowitz, 2006; Jensen and Haswell, 2012; Wilson et al., 2014), *msl2 msl3* leaves were small and malformed. To facilitate comparison, the same leaf from each genotype is marked with an asterisk in the time course in Fig. 1E. The percent of *msl2 msl3* seedlings with callus increased to ~82% by 21 DAG (Fig. 1F); callus was not observed in any wild type plants at any developmental stage.

We previously showed that growth on media containing increased levels of osmolytes (sugars or salt) suppressed the plastid morphology and leaf development phenotypes of *msl2 msl3* mutants, likely by increasing cytoplasmic osmolarity and reducing plastid hypoosmotic stress (Veley et al., 2012; Wilson et al., 2014). To determine if the same were true for callus formation, and to assess the dependence of suppression on age and developmental stage, seedlings were germinated on MS solid media and transferred to media containing 82 mM NaCl at 2, 5, 7, or 9 DAG and assessed at 21 DAG for callus formation and leaf development. Full suppression of callus formation and abnormal leaf development was only observed in seedlings transferred to solid media containing NaCl from MS at 2 DAG (Fig. 1G-J), establishing a small developmental window after which alleviation of plastid hypoosmotic stress can no longer suppress leaf morphology defects and apical callus production in *msl2 msl3* mutants. Suppression was also observed when seedlings were grown on media containing sucrose, sorbitol or mannitol, indicating that the effect is osmotic (Fig S1A.) The converse experiment, in which seedlings were transferred from salt-containing media to normal MS showed that plastid osmotic homeostasis is continuously required to maintain normal leaf development (Fig. 1H and S1B).

### **MSL2 function is required in the SAM or leaf primordia to prevent callus production**

To determine if MSL2 expression in the SAM and leaf primordia is required to prevent callus production in the *msl2 msl3* background, we examined apical callus production in *msl2 msl3* mutant plants expressing *MSL2* from the *SCARECROW (SCR)* promoter, which is expressed in the L1 cell layer of the meristem and leaf primordia (Wysocka-Diller et al., 2000). As shown in Fig. 1H, apical callus formation was fully suppressed in T2 *msl2 msl3 SCRpMSL2* lines. While these plants developed multiple sets of developmentally normal true leaves, the majority of T2 lines examined exhibited reduced stature.

### **Cells and plastids at the apex of young *msl2 msl3* mutants are morphologically abnormal**

Closer examination of the apex of young (4-day-old) *msl2 msl3* mutant seedlings revealed a cluster of disorganized and heterologously shaped cells with low electron density at the expected location of the SAM (Fig 2A). Most cells within the cluster contained large, spherical, clear entities. In comparison, the SAM cells of a wild type seedling were organized into cell layers and were electron-dense. We next used transmission electron microscopy to further characterize the morphology of developing chloroplasts and proplastids in the SAM and surrounding tissue of *msl2 msl3* mutant seedlings (Fig 2B). In the *msl2 msl3* mutant, young chloroplasts were enlarged, lacked the lens shape of wild-type chloroplasts, and exhibited a disorganized developing thylakoid network (Fig. 2B-D and S2B). In agreement with previous reports (Charuvi et al., 2012), wild-type proplastids appeared as small structures (0.5-1  $\mu$ m in diameter) containing rudimentary thylakoid networks of varying developmental stages, plastoglobules, and double membranes (Fig. 2G and Fig. S2A). However, in the SAM of *msl2 msl3* mutants, entities with these established features had decreased stromal density and were greatly enlarged compared to the wild type (asterisks in Fig. 2A and S2B, Fig. 2E). Many exceeded 5  $\mu$ m in diameter. All were clearly bound by a double membrane (white arrow, Fig. 2F and S2D-E). These data show that the greatly enlarged phenotype of non-green plastids of the leaf epidermis (Haswell and Meyerowitz, 2006; Velez et al., 2012) extends to proplastids of the SAM.

### **Callus produced in *msl2 msl3* mutants is associated with an altered cytokinin: auxin ratio and requires CK perception**

The production of shooty callus has been associated with increased production or availability of CKs and an imbalance in the cytokinin: auxin ratio (Frank et al., 2002; Frank et al., 2000; Lee et al., 2004). Consistent with these observations, apical callus production, dwarfing and leaf phenotypes of the *msl2 msl3* double mutant were strongly suppressed when seedlings were grown on media with the synthetic auxin 1-naphthaleneacetic acid (NAA) (Fig. 3A, C). The leaf epidermis of *msl2 msl3* seedlings contain grossly enlarged and round non-green plastids, as visualized with the fluorescent

plastid marker RecA-dsRED (Haswell and Meyerowitz, 2006; Veley et al., 2012; Wilson et al., 2014). This phenotype was not altered by growth on 2  $\mu$ M NAA (Fig. 3B), indicating that NAA treatment suppresses callus formation downstream of effects on plastid morphology. In agreement with previous data, growth on media supplemented with osmolytes fully suppressed the plastid morphology defects (Veley et al., 2012). Trans-Zeatin-riboside levels were increased ~6.5-fold in *msl2 msl3* mutant seedlings compared to the wild type, but IAA levels were not significantly changed (Fig. 3D).

The *ARABIDOPSIS HISTIDINE KINASE (AHK)2* gene encodes one of three related histidine kinases known to function as CK receptors in Arabidopsis (Ueguchi et al., 2001; Yamada et al., 2001), and an *AHK2* loss of function mutant, *ahk2-2* (Higuchi et al., 2004) is impaired in CK-induced up-regulation of *WUS* (Gordon et al., 2009). Two independently isolated *msl2 msl3 ahk2-2* triple mutants showed a significant reduction in apical callus formation with less than 40% of seedlings developing callus (Fig. 3F). However, the *msl2 msl3 ahk2-2* triple mutants were similar to the *msl2 msl3* double with respect to leaf developmental defect (Fig. 3E). Incomplete suppression may be due to redundancy among CK receptors (Gordon et al., 2009); or callus formation and leaf morphology defects may be produced through different pathways.

To determine if feedback loops involving *WUS*, *ARRs* (Gordon et al., 2009; Schuster et al., 2014), or the meristem identity gene *STM* (Scofield et al., 2013) were mis-regulated in *msl2 msl3* seedlings, quantitative RT-PCR was used to determine transcript levels in the aerial tissue of 7- and 21-day-old seedlings (Fig. 3G). In *msl2 msl3* mutant seedlings *WUS* transcript levels were up-regulated 5.3-fold compared to the wild type by 7 DAG (prior to visible callus development, Fig. 1E); and 4-fold by 21 DAG. *STM* expression levels were up-regulated 2.1-fold in 7-day-old *msl2 msl3* mutants, but were not distinguishable from the wild type at 21 DAG. Consistent with previous observations that they inhibit callus formation (Buechel et al., 2010; Liu et al., 2016), *ARR7* and *ARR15* transcript levels were reduced in both 7 and 21 day old *msl2 msl3* mutant seedlings compared to wild type, exhibiting 2 to 2.6-fold and 3- to 6-fold decreases, respectively. Transcriptional repression is specific to *ARR7* and *ARR15* as transcript levels of two other A-type *ARR* genes, *ARR4* and *ARR5*, were elevated in *msl2 msl3* mutant seedlings compared to wild type. Hypocotyls from *msl2 msl3* mutants did not efficiently produce callus in vitro, indicating that an additional signal or signals are required to produce callus outside the SAM in these mutants (Fig. S3A). Furthermore, multiple genes involved in wound-inducible and auxin-inducible callus production show altered expression in *msl2 msl3* mutants, including *WIND1*, *WIND3*, *KPR2*, *KPR7*, *TSD1* and *TSD2* (Anzola et al., 2010; Frank et al., 2002; Iwase et al., 2011; Krupkova and Schmulling, 2009) (Fig. S3B, C).



## Preventing Pro biosynthesis results in a dramatic increase in callus formation and CK levels in the *msl2 msl3* background

It was not obvious how the constitutive plastid osmotic stress experienced by *msl2 msl3* mutants might elicit these effects, but we reasoned that the hyper-accumulation of solutes previously observed in *msl2 msl3* mutants, especially the compatible osmolyte Proline (Pro) (Wilson et al., 2014), might be responsible. To test this hypothesis, we crossed the *pyrroline-5-carboxylate synthetase1-1* (*p5cs1-4*) lesion into the *msl2 msl3* mutant background. P5CS1 catalyzes the primary step in the inducible production of Pro (Verslues and Sharma, 2010), and stress-induced Pro levels are low in this mutant (Szekely et al., 2008). *msl2 msl3 p5cs1-4* triple mutant seedlings exhibited larger calluses than the *msl2 msl3* double, frequently forming multiple calluses (Figs. 1E, and S4A), and formation was more observed at earlier stages of development in *msl2 msl3 p5cs1-4* triple compared to *msl2 msl3* double mutants (Fig. 4A, light blue bars)—at 14 DAG over 40% of triple mutant seedlings had visible callus, while only 15% of the double *msl2 msl3* mutants did (Fig. 4A, light blue bars). Neither wild type nor *p5cs1-4* single mutants produced callus at any time point. A different mutant allele of *P5CS1*, *p5cs1-1* (Szekely et al., 2008), also enhanced callus formation in the *msl2 msl3* background (Fig. S4B-C). In addition *msl2 msl3 p5cs1-4* triple mutants exhibited 7 times more trans-Zeatin-riboside levels than *msl2 msl3* mutants (Fig. 3D). Supplementing growth media had no effect on callus production in *msl2 msl3* double or *msl2 msl3 p5cs1-4* triple mutants at any time point (Fig. 4A), even though *msl2 msl3 p5cs1-4* triple mutant seedlings grown on 20 mM Pro for 21 DAG contained as much Pro as the *msl2 msl3* double (Fig. 4B).

Thus, it is not the absence of Pro itself that leads to the enhanced callus production in the *msl2 msl3 p5cs1-4* triple mutants. Instead, disrupting the process of Pro biosynthesis could enhance callus formation in the *msl2 msl3* mutant background if ROS accumulation were involved, as Pro biosynthesis is a key reductive pathway that helps maintain cellular redox homeostasis (Szabados and Savoure, 2010). To characterize the levels and localization of ROS in *msl2 msl3* double and *msl2 msl3 p5cs1-4* triple mutants, 7-, 14-, and 21-day-old mutant and wild-type seedlings were stained with 3, 3-diaminobenzidine (DAB) to detect hydrogen peroxide ( $H_2O_2$ ) or nitroblue tetrazolium (NBT) to detect superoxide ( $O_2^-$ ) (Fig. 4C). Both double and triple mutants accumulated high levels of  $H_2O_2$  and  $O_2^-$  in the SAM region relative to the *p5cs1-4* single mutant or the wild type. Precipitate was visible earlier in the *msl2 msl3 p5cs1-4* triple mutant (by 14 DAG compared to 21 DAG in the double *msl2 msl3* mutant). Quantitation of  $H_2O_2$  levels using an Amplex Red enzyme assay at these same time points showed consistent accumulation of  $H_2O_2$  in the double and triple mutants, rising to nearly three-fold

over wild type by 21 DAG (Fig. 4D). Levels of formazan, the product of NBT reduction by  $O_2^-$ , increased in *msl2 msl3* and *msl2 msl3 p5cs1-4* to more than 2.5-fold above wild-type levels at 21 DAG (Fig. 4E). Calluses generated by incubating *Arabidopsis thaliana* Col-0 root explants on Callus Inducing Media also showed strong NBT staining in areas of cell proliferation (Fig. S4), providing evidence that ROS accumulation may be a general feature of callus tissue (Lee et al., 2004).

# **The accumulation of superoxide in response to plastid hypo-osmotic stress is required for callus formation in the *msl2 msl3* background.**

In plastids, the photoreduction of molecular  $O_2$  generates  $O_2^-$ , which is then rapidly converted into  $H_2O_2$  by plastid-localized superoxide dismutase enzymes (Asada, 2006). To determine if plastid osmotic stress and the accumulation of  $O_2^-$  at the apex of *msl2 msl3* double and *msl2 msl3 p5cs1-4* triple mutants play causative roles in callus formation, plants were germinated on or transferred to solid media with 82 mM NaCl or with TEMPOL (a  $O_2^-$  scavenger) at 3 or 7 DAG and stained with NBT at 21 DAG. Growth on media containing NaCl suppressed  $O_2^-$  accumulation in *msl2 msl3* double and *msl2 msl3 p5cs1-4* triple mutant seedlings (Fig. 5A), completely prevented callus formation (Fig. 5B), suppressed defects in non-green plastid morphology (Fig. 5C) and leaf morphology (Fig. 5A). Thus, plastid osmotic stress is responsible for  $O_2^-$  accumulation as well as callus formation in *msl2 msl3* and *msl2 msl3 p5cs1-4* mutants. Consistent with Fig. 1H, growth on NaCl suppressed callus formation and ROS accumulation only if supplied prior to 7 DAG.

Growth on TEMPOL-containing media successfully prevented the accumulation of  $O_2^-$  in the SAM of *msl2 msl3* and *msl2 msl3 p5cs1-4* mutants, regardless of seedling age at time of application (Fig. 5A), but did not affect plastid morphology (Fig. 5C) nor leaf morphology defects (Fig. 5A). Treating double and triple mutant seedlings with TEMPOL at all developmental stages partially suppressed callus formation (Fig. 5C). Less than 40% of double mutant seedlings exhibited apical calluses when grown in the presence of TEMPOL, compared to > 90% when grown on MS without TEMPOL. TEMPOL-mediated callus suppression is thus independent or downstream of the developmental window in which addition of osmotic support must be provide for complete suppression of aerial phenotypes (Figs 1H and 5A-B).

A complementary genetic approach to suppressing  $O_2^-$  accumulation in the plastid was taken by over-expressing wild type or miR398-resistant forms of the chloroplast-localized Cu/Zn Superoxide Dismutase CSD2 (Kliebenstein et al., 1998; Sunkar et al., 2006) in the *msl2 msl3* mutant background. The percentage of seedlings with visible apical callus at 21 DAG was decreased to 50% or less in six

independent T2 lines segregating either wild-type (*CSD2*, lines #2, #4, and #7) or miR398 resistant (*mCSD2*, lines #1, #3, #5) *CSD2* over-expression constructs (Fig. 5D). Approximately 50% of T2 seedlings showed strong  $O_2^-$  accumulation by NBT staining, which was localized to developing callus, compared to 90% of *msl2 msl3* seedlings (Fig. 5E). 15-30% of seedlings in the *CSD2* over-expression lines exhibited both low levels of  $O_2^-$  accumulation at their shoot apex and did not develop callus; less than 5% of *msl2 msl3* seedlings had these characteristics. Over-expression of *CSD2* did not suppress abnormal leaf development (white arrows, Fig. 5F).

### **Callus production requires ABA biosynthesis, ABI4 and GUN1**

As *msl2 msl3* double mutants exhibit increased levels of ABA and up-regulation of ABA biosynthesis genes (Wilson et al., 2014), we hypothesized that a pathway involving the hormone ABA and the *GUN1* and *ABI4* gene products might account for the pleiotropic defects in the *msl2 msl3* mutant (Koussevitzky et al., 2007; Zhang et al., 2013). To determine if ABA biosynthesis was required for callus production, we assessed the effect of introducing the *abscisic acid-deficient 2-1* allele (Schwartz et al., 1997) on callus formation in the *msl2 msl3* background. Indeed, callus formation and leaf development defects were strongly suppressed in a triple *msl2 msl3 aba2-1* mutant, with only ~20% of seedlings developing callus at the shoot apex by 21 DAG (Fig. 6A, B). Similar suppression of *msl2 msl3* aerial defects was observed in four other independently isolated *msl2 msl3 aba2-1* triple mutant lines. The *msl2 msl3 aba2-1* triple mutant accumulated trans-Zeatin-riboside to levels similar to the *msl2 msl3* double mutant (Fig. 3D), suggesting that ABA and CK promote callus formation through independent pathways.

To test if *GUN1* is involved in the perception of signals generated by plastid osmotic stress, we crossed the *gun1-9* (Koussevitzky et al., 2007) allele into the *msl2 msl3* mutant background and analyzed the offspring of a single *msl2 msl3 gun1-2 (+/-)* mutant plant. Of twenty-seven triple *msl2 msl3 gun1-9* seedlings identified by PCR genotyping, none formed apical callus when grown on solid media, whereas 16 of 19 genotyped sibling *msl2 msl3 gun1-9 (+/-)* seedlings did. In addition, *msl2 msl3 gun1-9* triple mutant siblings produced larger, greener, and more normally shaped true leaves than their *msl2 msl3* and *msl2 msl3 gun1-9+/1* siblings (Fig. 6C, D). In some seedlings, small and chlorotic true leaves developed at the seedling apex (Fig. 6E, S5).

The strong *abi4-1* allele (Finkelstein et al., 1998) was also introduced into the *msl2 msl3* background, and *msl2 msl3 abi4-1* mutants also exhibited reduced apical callus formation; only ~26% of *msl2 msl3 abi4-1* seedlings from two independently isolated lines developed callus (Fig. 6F). Neither leaf

309 developmental defects nor ROS accumulation was suppressed in the *msl2 msl3 abi4-1* mutant, and  
 310 *msl2 msl3 abi4-1* seedlings stained with DAB or NBT showed a pattern of ROS accumulation similar  
 311 to the *msl2 msl3* double mutant (Fig. 6F, G). These staining patterns were not observed in wild type or  
 312 *abi4-1* single mutants. These results are consistent with a model wherein ABI4 functions downstream  
 313 of ROS accumulation, and likely in a pathway with GUN1, to induce apical callus formation in  
 314 response to plastid osmotic stress.  
 315

# DISCUSSION

One of the most fundamental decisions a cell can make is whether to proliferate or to differentiate. In the plant SAM, this decision must be spatially and temporally controlled, so that cells remain in an undifferentiated, pluripotent state in the central zone of the meristem and then differentiate properly as they are recruited into organs at the PZ. Here we use the *msl2 msl3* mutant as a model system to show that, in the Arabidopsis SAM, proliferation versus differentiation signals are coordinated not only at the tissue- and cellular-level, but also at the organellar level. We further applied genetic, molecular, biochemical, and pharmacological approaches to identify two non-redundant pathways through which plastid osmotic stress may produce apical callus (illustrated in Fig. S6).

## Plastid osmotic stress results in the production of callus at the plant SAM

Plants lacking functional versions of the mechanosensitive ion channel homologs MSL2 and MSL3 robustly produce callus tissue at the apex of the plant when grown on solid media (Fig. 1). Molecular complementation with *MSL2* under the control of the *SCARECROW* promoter established that MSL2/MSL3 are required only in the L1 layer of the CZ and/or PZ of the SAM to prevent callus formation (Fig. 2G) and that their function is critical during the first 5 days after germination (Fig 1G, H). The production of apical callus in the *msl2 msl3* mutant is associated with dramatically enlarged and developmentally abnormal plastids specifically in the SAM (Fig. 2A-F, S2A-D). Developmentally defective plastids were also observed in the SAM of another apical callus-producing mutant, *tumorous shoot development (tsd)1* (Frank et al., 2002).

## Increased proliferation and the production of callus in *msl2 msl3* mutants is associated with a disruption in the CK/WUS feedback loop

The *msl2 msl3* mutants exhibit several previously established hallmarks of increased proliferation at the SAM, including increased levels of CK, up-regulation of the stem cell identity gene *WUSCHEL*, and down-regulation of CK signaling inhibitors (Fig. 3D, G), suggesting that plastid osmotic stress activates the CK/WUS feedback loop (Gaillochet et al., 2015; Ikeuchi et al., 2013) (top pathway, Fig. S6). The resulting imbalance in the cytokinin: auxin ratio may underlie callus formation in the *msl2 msl3* background, as supplementing seedlings with exogenous auxin robustly suppresses all mutant phenotypes (Fig. 3A, C) without affecting plastid osmotic stress (Fig 3B). In addition, the CK receptor AHK2 is required for efficient callus formation (Fig. 3E, F). *AHK2* is required to maintain WUS expression in the meristem in response to CK treatment in the CK/WUS feedback loop (Gordon et al.,

2009). Cytokinin and auxin are involved in the production of all types of callus (Perianez-Rodriguez et al., 2014; Skoog and Miller, 1957), so alternative pathways to callus production cannot be ruled out.

Several previously identified callus-producing mutants in *Arabidopsis* and *Helianthus* also exhibit both up-regulated CK signaling and defects in meristem identity gene expression, including *tsd1* (Frank et al., 2002; Krupkova and Schumling, 2009); EMB-2 (Chiappetta et al., 2006); and the *pasticcino* mutants (Faure et al., 1998; Harrar et al., 2003). These data suggest that, the CK-induced pathway, the wound-induced pathway and the meristematic identity pathway are interconnected pathways for callus production. Furthermore, the *msl2 msl3* double mutant is the only callus-producing mutant identified to date with a primary defect in plastid-localized proteins, adding a novel regulatory aspect to these known pathways, and suggesting that plastid osmotic stress is uniquely able to trigger these pathways. While we favor the model shown in Fig. S6, other interpretations are possible. Also consistent with these data is a model wherein the *msl2 msl3* lesions lead to down-regulation of *TSD1* and/or *TSD2*, or up-regulation of *WIND* genes, either of which could disrupt the CK/WUS loop.

# **Plastid retrograde signaling is required for increased proliferation and the production of callus**

Genetic lesions that reduce Pro biosynthesis significantly exacerbated callus production in the *msl2 msl3* background, an effect that can not be attributed to low levels of Pro itself (Figs. 1E, 4A, B, S4). Instead, the hyper-accumulation of ROS that results from blocking Pro biosynthesis is required (Fig. 5). Treatment with exogenous ROS scavenger TEMPOL as well as over-production of CSD2, a chloroplast-localized superoxide-scavenging enzyme, prevented or reduced callus formation. Plastid osmotic stress was required for ROS hyper-accumulation (Fig. 5A-C). In addition, the analysis of callus formation in higher order mutants established that ABA biosynthesis, the retrograde signaling protein GUN1, and the transcription factor ABI4 were required for callus formation and act downstream of ROS (Fig. 6, bottom pathway in Fig. S6). Because we were able to specifically suppress callus production, ROS accumulation, and impaired leaf development by increasing cytoplasmic osmolarity in the *msl2 msl3* background, this phenotype is very unlikely to be due to a loss of specific signaling by MSL2 or MSL3.

Multiple genetic links between plastid function and cell differentiation in the shoot have been previously described, and are often cited as evidence for retrograde signaling (Inaba and Ito-Inaba, 2010; Lepisto and Rintamaki, 2012; Lundquist et al., 2014). ROS accumulation has been documented in at least one other callus-producing mutant, *tsd2/quasimodo2* (Raggi et al., 2015). Whether ROS and/or an ABA/GUN1/ABI4 retrograde signaling pathway are employed to communicate plastid



dysfunction to shoot development in any of these other mutants is not known. However, the application of pharmacological inhibitors of plastid development or function was used to demonstrate that leaf adaxial/abaxial patterning is regulated by plastid protein translation in a GUN1-dependent pathway (Tameshige et al., 2013), and the GUN1 pathway is required to facilitate the switch from leaf cell proliferation to expansion and differentiation (Andriankaja et al., 2012). Taken together with the results reported here, these data support previously proposed models wherein a variety of plastid dysfunctions are communicated to leaf development through similar or overlapping pathways that include GUN1 (Koussevitzky et al., 2007; Leon et al., 2012). ABI4 may function with GUN1 in this retrograde signaling pathway, or the reduction in *msl2 msl3* callus production in the *abi4-1* mutant background may result from indirect effects on sugar signaling or ABA biosynthesis.

We note that only a few of the genetic or pharmacological treatments that suppressed callus formation in the *msl2 msl3* mutant also suppressed the leaf developmental defects. Growth on exogenous auxin was the only treatment to completely suppress all of the mutant phenotypes, while preventing CK signaling, ABA biosynthesis, ROS accumulation, GUN1, or ABI4 function only partially rescued leaf defects (Figs. 3E-F, 6A-E). It is possible that these differences are due to genetic redundancy or to limited uptake or transport of TEMPOL. Alternatively, there may be two fundamentally different processes that respond to plastid osmotic stress in the *msl2 msl3* mutant: one that functions in the SAM during early development, and one that functions later on in the leaves. In support of the latter proposal, subjecting seedlings to mild hyperosmotic stress has been shown to prevent leaf cell proliferation (Skirycz et al., 2011).

# ***msl2 msl3* mutants may provide a functional link between the CK/WUS feedback loop and plastid retrograde signaling in controlling cell differentiation at the plant apex.**

Our working model, illustrated in Fig. S6, is that the production of apical callus in *msl2 msl3* mutants operates through two non-redundant pathways: the CK/WUS feedback loop and a retrograde signaling pathway involving ROS, ABA, ABI4 and GUN1. While the data presented here establish that both of these pathways are required for callus formation in the *msl2 msl3* background, whether they operate completely independently or are interconnected is not yet clear. Here we present them as separate pathways; support for this comes from the fact that CK levels remain elevated in the *aba2 msl2 msl3* triple mutant (Fig. 3D), indicating that ABA biosynthesis is not upstream of the CK/WUS feedback loop. Furthermore, mutants that solely overproduce plastid ROS (Myouga et al., 2008) up-regulate CK signaling (To et al., 2004), or hyper-accumulate Pro (Mattioli et al., 2008) have not been reported to produce apical callus, implying that a combination of these signals is required.

417

418 We speculate that two-way communication between plastids and cell differentiation is essential to  
 419 coordinate the developmental and functional state of the plastid with that of the cell within which it  
 420 resides, and that it therefore necessarily involves multiple pathways. These results add yet another  
 421 layer of complexity to the many regulatory pathways and feedback loops that govern dynamic cell  
 422 identity decision-making at the plant shoot apex, and provide a foundation for future investigation into  
 423 the relationship between meristem identity and plastid osmotic homeostasis in the SAM.



## MATERIALS AND METHODS

### *Arabidopsis thaliana* Mutants

The *aba2-1* (CS156), *abi4-1* (CS8104), *p5cs1-4* (SALK\_063517), *p5cs1-1* (SALK\_058000), *ahk2-2* (SALK\_052531), *gun1-9*, and *msl2-3* alleles are in the Columbia-0 background. The *msl3-1* allele is in the Wassilewskija background (Haswell and Meyerowitz, 2006). Derived cleaved-amplified polymorphic sequence genotyping (Neff et al., 1998) of the *gun1-9* allele was performed using oligos CGAACGACGAAAGATTGTGAGGAGGGTCT and CCTGCAAGCATTTCAGAATCGCTGAAAAAGG, digesting with PstI. The *abi4-1* allele was genotyped with oligos TCAATCCGATTCCACCACCGAC and CCACTTCCTCCTTGTTCTGC, digesting with NlaI. PCR genotyping of *msl*, *p5cs1*, and *aba2-1* alleles was performed as previously described (Sharma and Verslues, 2010; Szekely et al., 2008; Wilson et al., 2011).

### Plant Growth

Plants were grown on full-strength Murashige and Skoog (MS) medium (pH 5.7; Caisson Labs) with 0.8% (w/v) agar (Caisson Labs). NaCl, L-Pro (Sigma) and TEMPOL (Sigma) were added before autoclaving. For transfer assays, seed was surface-sterilized, sown on nylon mesh strips overlaid on 1X MS or 1X MS + 82 mM NaCl, and stratified for 2 d at 4°C before growth and transfer as described. All plants were grown at 23°C under a 16 h light regime, 130-160  $\mu\text{mol m}^{-2} \text{s}^{-1}$ .

### Microscopy

Confocal microscopy of ds-RED labeled non-green plastids was performed as in (Wilson et al., 2014). Bright-field images were captured with an Olympus DP71 microscope digital camera and processed with DP-BSW software. Apical meristems were ultra-rapidly frozen in a Baltec high- pressure freezer (Bal-Tec HPM010), excluding air with packing buffer (75 mM PIPES, pH 6.8, 50 mM sucrose). Samples were freeze substituted in 2% osmium/ acetone at -85°C for five days, slowly thawed to 25°C over 16 hours, and embedded in Spurr's resin. One  $\mu\text{m}$  sections for phase microscopy were stained 30 seconds with 1% Toluidine Blue O in 1% boric acid. Transmission electron microscopy was done on thin sections of tissue fixed for 2 h in 2% glutaraldehyde, post-fixed 90 minutes in 2% osmium tetroxide and embedded in Spurr's resin. Sections were stained in uranyl and lead salts.

### ROS Detection and Quantification

Detection of H<sub>2</sub>O<sub>2</sub> using 3,3'-Diaminobenzidine (DAB, Sigma) was performed as described (Wu et al., 2012) with the following modifications. Whole seedlings were incubated for 2 hrs in 1 mg/ml DAB prior to vacuum infiltration, incubated in the dark for an additional 12 hrs, then cleared with an ethanol series. An Amplex Red Hydrogen Peroxide/Peroxidase Assay Kit (Invitrogen) was used to measure H<sub>2</sub>O<sub>2</sub> production in seedlings. For in vitro localization of O<sub>2</sub><sup>-</sup> with Nitrotetrazolium Blue chloride (NBT; Sigma), whole seedlings were vacuum-infiltrated with 0.1% (w/v) NBT in a 10 mM potassium phosphate buffer (pH 7.8) containing 10 mM NaN<sub>3</sub>. After 1-hour incubation in the dark at RT seedlings were cleared with an ethanol series. Quantification of formazan levels was performed as described in (Myouga et al., 2008).

### Subcloning and Transgenic lines

pENTR-MSL2 (Haswell and Meyerowitz, 2006) was used in a Gateway technology (Life Technologies) recombination reaction with pSCR:GW (Michniewicz et al., 2015) to create *pSCR:MSL2*.

### Quantitative Reverse Transcription-PCR

Quantitative reverse transcription-PCR was performed as previously described (Wilson et al., 2011). Primers used for gene expression analysis of *ACTIN* and *ARR* genes were previously described (Wilson et al., 2014; Zhao et al., 2010). The following primer pairs were used to amplify *WUS* (GCGATGCTTATCTGGAACAT and CTTCCAGATGGCACCCTAC) and *STM* (CAAATGGCCTTACCCTTCG and GCCGTTTCCTCTGGTTTATG).

### ACKNOWLEDGEMENTS

We thank Kelsey Kropp, Jeffrey Berry and the Proteomics and Mass Spectrometry Facility of the Donald Danforth Plant Science Center for technical assistance, Lucia Strader for *abi4-1* seeds and pSCR:GW, Ramanjulu Sunkar for pBIB-CSD2 and pBIB-mCSD2, and Joanne Chory for *gun1-9* seeds. This research was funded by NSF MCB-1253103 and NASA NNX13AM55G.

### COMPETING INTERESTS

No competing interests declared.

### AUTHOR CONTRIBUTIONS

Study conception and manuscript preparation, MEW, ESH; conducting research and formal analysis, MEW, RHB, MM; funding acquisition, ESH.

# FIGURE LEGENDS

**Fig. 1. *msl2 msl3* double mutants develop callus at the shoot apex.** (A-D) Bright-field images of 21-day-old *msl2 msl3* seedlings grown on solid media. Shooty callus is indicated with a white arrowhead in (D). (E) Time course of callus formation. (F) Average percent of *msl2 msl3* seedlings with visible callus at the indicated time after germination. Five plates of seedlings,  $n > 10$  seedlings per plate, were analyzed per time point. (G) 21-day-old seedlings scored in (H) (top) or seedlings transferred from MS with 82 mM NaCl to MS at indicated time points (bottom). (H) The average percent of *msl2 msl3* seedlings showing visible callus at 21 DAG after transfer from MS to MS (black bars) or from MS to MS with 82 mM NaCl (grey bars) at the indicated time points. 3 plates of seedlings,  $n > 10$  seedlings per plate, were analyzed per treatment. Error bars indicate SEM. \*, difference between indicated samples,  $P < 0.01$  (Student's *t*-test). (I-M) Close-up images of individual seedlings shown in (G) grown without NaCl (I) or transferred to NaCl plates at 2 (J), 5 (K), or 7 (L) DAG. (M) Bright-field images of 14-day-old *msl2 msl3* seedlings harboring the *MSL2* transgene (*MSL2g*) or *MSL2* under the control of the *SCR* promoter. Size bars (A-E), 1 mm, (G, M), 5 mm, (I-L), 2.5 mm.

**Fig. 2. Four-day-old *msl2 msl3* mutants exhibit abnormal cellular organization and plastids at the SAM.** (A) Phase contrast images of the SAM region of seedlings of the indicated genotypes. Size bar, 50  $\mu$ m. (B-G) Transmission electron microscope (TEM) images of *msl2 msl3* mutant SAM (B) and developing chloroplasts (C-D) and proplastids (E-F) in wild type and *msl2 msl3* mutant seedlings. (G) Magnified region of *msl2 msl3* plastid envelope, indicated by box in F. Examples of proplastids and developing chloroplasts are indicated in *msl2 msl3* mutant by asterisks and black arrowheads, respectively. Size bar, 10  $\mu$ m (B-D), 1  $\mu$ m (E), and 100 nm (F-G). Plastoglobules (PG), double membrane (white arrowheads), and thylakoids (double black arrowheads) are indicated.

**Fig. 3. Callus produced in *msl2 msl3* mutants is associated with increased CK production and requires CK signaling.** (A) Seedlings grown for 21 days on solid media containing the indicated concentration of NAA. Size bar, 1 mm. (B) Confocal micrographs of non-green plastids in the first true leaf of *msl2 msl3* mutants harboring the RecA-dsRED plastid marker and grown on indicated media. Size bar, 10  $\mu$ m. (C) Percent of *msl2 msl3* mutants exhibiting callus when grown on NAA. The average of three biological replicates of  $\geq 20$  seedlings each is presented. Statistical groups were determined by ANOVA followed by Tukey's HSD test,  $P < 0.01$ . (D) Trans-Zeatin-riboside and IAA levels of 21-day-old seedlings determined by liquid chromatography-mass spectrometry/mass spectrometry analysis as in (Chen et al., 2009). The average of three biological replicates of  $\geq 30$  seedlings each is

presented. Error bars indicate SD, \*, difference from wild type,  $P < 0.01$  (Student's  $t$ -test). Images of seedlings (E) and callus production rates (F) of *msl2 msl3 ahk2-2* triple mutant and parental lines. Size bar, 1 mm. White arrows mark deformed leaves. The average of four biological replicates of  $\geq 20$  seedlings each is presented. Error bars indicate SEM. \*, difference from *msl2 msl3*,  $P < 0.01$  (Student's  $t$ -test). (G) Quantitative RT-PCR analysis of gene expression in the *msl2 msl3* mutant. The average of three biological replicates (two technical replicates;  $n \geq 25$  seedlings each) is presented. Error bars indicate SEM, asterisks indicate difference from wild type of same age,  $**P \leq 0.05$ ,  $**P \leq 0.01$  (Student's  $t$ -test).

**Fig. 4. Preventing Pro biosynthesis results in a dramatic increase in callus formation in the *msl2 msl3* background.** (A) Production of apical callus in *msl2 msl3* and *msl2 msl3 p5cs1-4* seedlings in the presence and absence of exogenously provided Pro. The average of three biological replicates is presented,  $n \geq 25$  seedlings each. Error bars represent SD. \*, difference from *msl2 msl3* seedlings of the same age,  $P < 0.01$  (Student's  $t$ -test). (B) Pro content of the aerial tissue of mutant and wild-type seedlings grown as in (A), measured as in (Wilson et al., 2014). The average of two biological replicates (each performed in triplicate;  $n \geq 30$  seedlings each) is presented. (C) Images of the meristematic region of seedlings stained with DAB or NBT. Size bar, 1 mm. Quantification of  $H_2O_2$  content by Amplex Red (D) and  $O_2^-$  production by NBT-Formazan production (E) in mutant and wild-type seedlings of indicated age. The average of three biological replicates ( $n \geq 20$  seedlings each), two technical replicates each, is presented in both (D) and (E). Statistical grouping in (B), (D), and (E) was performed as in Fig. 3C, and error bars indicate SEM. FW, fresh weight.

**Fig. 5. Hyper-accumulation of superoxide is required for callus formation in *msl2 msl3* and *msl2 msl3 p5cs1* seedlings.** (A) NBT stained seedlings provided with TEMPOL or NaCl at 0, 3 or 7 DAG. Size bar, 1mm. (B) Callus production in mutant seedlings when grown on MS, MS with 1 mM TEMPOL or MS with 82 mM NaCl. (C) Confocal micrographs of non-green plastids in the first true leaf of *msl2 msl3* mutants harboring the RecA-dsRED plastid marker grown on the indicated media. Size bar, 10  $\mu m$ . (D) Apical callus production in T2 lines segregating transgenes that over-express *CSD2* or *mCSD2*. The average of 4 biological replicates ( $n \geq 35$  seedlings each replicate) is presented. Error bars indicate SD. Statistical grouping was performed as in Fig. 3C. (E) Percent of seedlings from (D) stained with NBT accumulating formazan at the shoot apex. ( $n \geq 20$  seedlings). (F) Images of *CSD2* over-expression T2 lines. Size bar, 1 mm. White arrows mark deformed leaves.

**Fig. 6. Callus production requires ABA biosynthesis, GUN1 and ABI4.** (A) 21-day-old *msl2 msl3* double and *msl2 msl3 aba2-1* triple mutant seedlings. (B) Callus production in higher order mutants at 21 DAG. The average of 3 biological replicates ( $n \geq 15$  seedlings per replicate) is presented. Error bars indicate SEM. (C-D) 21-day-old *msl2 msl3 gun1-9* (+/-) (C) and *msl2 msl3 gun1-9* (-/-) (D, E) siblings at 21 DAG. (F) 21-day-old *msl2 msl3 abi4-1* seedlings with relevant parental controls. (G) 21-day-old seedlings of the indicated genotypes stained with DAB or NBT. (A, F, G) Size bar, 1 mm. (C, D, E) Size bar, 2.5 cm.

# REFERENCES

- Aichinger, E., Kornet, N., Friedrich, T. and Laux, T.** (2012). Plant stem cell niches. *Annual Review of Plant Biology* **63**, 615-636.
- Andriankaja, M., Dhondt, S., De Bodt, S., Vanhaeren, H., Coppens, F., De Milde, L., Muhlenbock, P., Skirycz, A., Gonzalez, N., Beemster, G. T., et al.** (2012). Exit from proliferation during leaf development in *Arabidopsis thaliana*: a not-so-gradual process. *Developmental Cell* **22**, 64-78.
- Anzola, J. M., Sieberer, T., Ortbauer, M., Butt, H., Korbei, B., Weinhofer, I., Mullner, A. E. and Luschnig, C.** (2010). Putative *Arabidopsis* transcriptional adaptor protein (PROPORZ1) is required to modulate histone acetylation in response to auxin. *Proceedings of the National Academy of Sciences of the United States of America* **107**, 10308-10313.
- Asada, K.** (2006). Production and scavenging of reactive oxygen species in chloroplasts and their functions. *Plant Physiology* **141**, 391-396.
- Barton, M. K.** (2010). Twenty years on: the inner workings of the shoot apical meristem, a developmental dynamo. *Dev Biol* **341**, 95-113.
- Buechel, S., Leibfried, A., To, J. P., Zhao, Z., Andersen, S. U., Kieber, J. J. and Lohmann, J. U.** (2010). Role of A-type ARABIDOPSIS RESPONSE REGULATORS in meristem maintenance and regeneration. *Eur J Cell Biol* **89**, 279-284.
- Chan, K. X., Phua, S. Y., Crisp, P., McQuinn, R. and Pogson, B. J.** (2015). Learning the Languages of the Chloroplast: Retrograde Signaling and Beyond. *Annual Review of Plant Biology* **67**, 25-53.
- Charuvi, D., Kiss, V., Nevo, R., Shimoni, E., Adam, Z. and Reich, Z.** (2012). Gain and loss of photosynthetic membranes during plastid differentiation in the shoot apex of *Arabidopsis*. *The Plant Cell* **24**, 1143-1157.
- Chen, Q., Zhang, B., Hicks, L. M., Wang, S. and Jez, J. M.** (2009). A liquid chromatography-tandem mass spectrometry-based assay for indole-3-acetic acid-amido synthetase. *Anal Biochem* **390**, 149-154.
- Chiappetta, A., Michelotti, V., Fambrini, M., Bruno, L., Salvini, M., Petrarulo, M., Azmi, A., Van Onckelen, H., Pugliesi, C. and Bitonti, M. B.** (2006). Zeatin accumulation and misexpression of a class I knox gene are intimately linked in the epiphyllous response of the interspecific hybrid EMB-2 (*Helianthus annuus* x *H. tuberosus*). *Planta* **223**, 917-931.
- Chickarmane, V. S., Gordon, S. P., Tarr, P. T., Heisler, M. G. and Meyerowitz, E. M.** (2012). Cytokinin signaling as a positional cue for patterning the apical-basal axis of the growing

600 Arabidopsis shoot meristem. *Proceedings of the National Academy of Sciences of the United*  
601 *States of America* **109**, 4002-4007.

602 **Cottage, A., Mott, E. K., Kempster, J. A. and Gray, J. C.** (2010). The Arabidopsis plastid-signalling  
603 mutant *gun1* (genomes uncoupled1) shows altered sensitivity to sucrose and abscisic acid and  
604 alterations in early seedling development. *Journal of Experimental Botany* **61**, 3773-3786.

605 **Endrizzi, K., Moussian, B., Haecker, A., Levin, J. Z. and Laux, T.** (1996). The SHOOT  
606 MERISTEMLESS gene is required for maintenance of undifferentiated cells in Arabidopsis  
607 shoot and floral meristems and acts at a different regulatory level than the meristem genes  
608 WUSCHEL and ZWILLE. *The Plant Journal* **10**, 967-979.

609 **Estavillo, G. M., Crisp, P. A., Pornsiriwong, W., Wirtz, M., Collinge, D., Carrie, C., Giraud, E.,**  
610 **Whelan, J., David, P., Javot, H., et al.** (2011). Evidence for a SAL1-PAP chloroplast  
611 retrograde pathway that functions in drought and high light signaling in Arabidopsis. *The Plant*  
612 *Cell* **23**, 3992-4012.

613 **Faure, J. D., Vittorioso, P., Santoni, V., Fraisier, V., Prinsen, E., Barlier, I., Van Onckelen, H.,**  
614 **Caboche, M. and Bellini, C.** (1998). The PASTICCINO genes of Arabidopsis thaliana are  
615 involved in the control of cell division and differentiation. *Development* **125**, 909-918.

616 **Fernandez, A. P. and Strand, A.** (2008). Retrograde signaling and plant stress: plastid signals initiate  
617 cellular stress responses. *Curr Opin Plant Biol* **11**, 509-513.

618 **Finkelstein, R. R., Wang, M. L., Lynch, T. J., Rao, S. and Goodman, H. M.** (1998). The Arabidopsis  
619 abscisic acid response locus ABI4 encodes an APETALA 2 domain protein. *The Plant Cell* **10**,  
620 1043-1054.

621 **Fletcher, J. C., Brand, U., Running, M. P., Simon, R. and Meyerowitz, E. M.** (1999). Signaling of  
622 cell fate decisions by CLAVATA3 in Arabidopsis shoot meristems. *Science* **283**, 1911-1914.

623 **Frank, M., Guivarc'h, A., Krupkova, E., Lorenz-Meyer, I., Chriqui, D. and Schmulling, T.** (2002).  
624 Tumorous shoot development (TSD) genes are required for co-ordinated plant shoot  
625 development. *The Plant Journal* **29**, 73-85.

626 **Frank, M., Rupp, H. M., Prinsen, E., Motyka, V., Van Onckelen, H. and Schmulling, T.** (2000).  
627 Hormone autotrophic growth and differentiation identifies mutant lines of Arabidopsis with  
628 altered cytokinin and auxin content or signaling. *Plant Physiology* **122**, 721-729.

629 **Gaillochet, C., Daum, G. and Lohmann, J. U.** (2015). O cell, where art thou? The mechanisms of  
630 shoot meristem patterning. *Curr Opin Plant Biol* **23**, 91-97.

631 **Gaillochet, C. and Lohmann, J. U.** (2015). The never-ending story: from pluripotency to plant  
632 developmental plasticity. *Development* **142**, 2237-2249.



- Gordon, S. P., Chickarmane, V. S., Ohno, C. and Meyerowitz, E. M.** (2009). Multiple feedback loops through cytokinin signaling control stem cell number within the Arabidopsis shoot meristem. *Proceedings of the National Academy of Sciences of the United States of America* **106**, 16529-16534.
- Hamilton, E. S., Jensen, G. S., Maksaev, G., Katims, A., Sherp, A. M. and Haswell, E. S.** (2015). Mechanosensitive channel MSL8 regulates osmotic forces during pollen hydration and germination. *Science* **350**, 438-441.
- Harrar, Y., Bellec, Y., Bellini, C. and Faure, J. D.** (2003). Hormonal control of cell proliferation requires PASTICCINO genes. *Plant Physiology* **132**, 1217-1227.
- Haswell, E. S. and Meyerowitz, E. M.** (2006). MscS-like proteins control plastid size and shape in Arabidopsis thaliana. *Current Biology : CB* **16**, 1-11.
- Higuchi, M., Pischke, M. S., Mahonen, A. P., Miyawaki, K., Hashimoto, Y., Seki, M., Kobayashi, M., Shinozaki, K., Kato, T., Tabata, S., et al.** (2004). In planta functions of the Arabidopsis cytokinin receptor family. *Proceedings of the National Academy of Sciences of the United States of America* **101**, 8821-8826.
- Ikeuchi, M., Sugimoto, K. and Iwase, A.** (2013). Plant callus: mechanisms of induction and repression. *The Plant Cell* **25**, 3159-3173.
- Inaba, T. and Ito-Inaba, Y.** (2010). Versatile roles of plastids in plant growth and development. *Plant & Cell Physiology* **51**, 1847-1853.
- Iwase, A., Mitsuda, N., Koyama, T., Hiratsu, K., Kojima, M., Arai, T., Inoue, Y., Seki, M., Sakakibara, H., Sugimoto, K., et al.** (2011). The AP2/ERF transcription factor WIND1 controls cell dedifferentiation in Arabidopsis. *Current Biology : CB* **21**, 508-514.
- Jensen, G. S. and Haswell, E. S.** (2012). Functional analysis of conserved motifs in the mechanosensitive channel homolog MscS-Like2 from Arabidopsis thaliana. *PloS one* **7**, e40336.
- Jiang, F., Feng, Z., Liu, H. and Zhu, J.** (2015). Involvement of Plant Stem Cells or Stem Cell-Like Cells in Dedifferentiation. *Frontiers in Plant Science* **6**, 1028.
- Kliebenstein, D. J., Monde, R. A. and Last, R. L.** (1998). Superoxide dismutase in Arabidopsis: an eclectic enzyme family with disparate regulation and protein localization. *Plant Physiology* **118**, 637-650.
- Koussevitzky, S., Nott, A., Mockler, T. C., Hong, F., Sachetto-Martins, G., Surpin, M., Lim, J., Mittler, R. and Chory, J.** (2007). Signals from chloroplasts converge to regulate nuclear gene expression. *Science* **316**, 715-719.



666 **Krupkova, E. and Schmulling, T.** (2009). Developmental consequences of the tumorous shoot  
667 development1 mutation, a novel allele of the cellulose-synthesizing KORRIGAN1 gene. *Plant*  
668 *Molecular Biology* **71**, 641-655.

669 **Larkin, R. M.** (2014). Influence of plastids on light signalling and development. *Philosophical*  
670 *Transactions of the Royal Society of London* **369**, 20130232.

671 **Lee, J. H., Kim, D. M., Lim, Y. P. and Pai, H. S.** (2004). The shooty callus induced by suppression of  
672 tobacco CHRK1 receptor-like kinase is a phenocopy of the tobacco genetic tumor. *Plant Cell*  
673 *Rep* **23**, 397-403.

674 **Leibfried, A., To, J. P., Busch, W., Stehling, S., Kehle, A., Demar, M., Kieber, J. J. and Lohmann,**  
675 **J. U.** (2005). WUSCHEL controls meristem function by direct regulation of cytokinin-inducible  
676 response regulators. *Nature* **438**, 1172-1175.

677 **Leon, P., Gregorio, J. and Cordoba, E.** (2012). ABI4 and its role in chloroplast retrograde  
678 communication. *Frontiers in Plant Science* **3**, 304.

679 **Lepisto, A. and Rintamaki, E.** (2012). Coordination of plastid and light signaling pathways upon  
680 development of Arabidopsis leaves under various photoperiods. *Molecular Plant* **5**, 799-816.

681 **Levina, N., Totemeyer, S., Stokes, N. R., Louis, P., Jones, M. A. and Booth, I. R.** (1999).  
682 Protection of Escherichia coli cells against extreme turgor by activation of MscS and MscL  
683 mechanosensitive channels: identification of genes required for MscS activity. *The EMBO*  
684 *Journal* **18**, 1730-1737.

685 **Liu, Z., Li, J., Wang, L., Li, Q., Lu, Q., Yu, Y., Li, S., Bai, M. Y., Hu, Y. and Xiang, F.** (2016).  
686 Repression of callus initiation by the miRNA-directed interaction of auxin-cytokinin in  
687 Arabidopsis thaliana. *The Plant Journal* [Epub ahead of print].

688 **Long, J. A., Moan, E. I., Medford, J. I. and Barton, M. K.** (1996). A member of the KNOTTED class  
689 of homeodomain proteins encoded by the STM gene of Arabidopsis. *Nature* **379**, 66-69.

690 **Luesse, D. R., Wilson, M. E. and Haswell, E. S.** (2015). RNA Sequencing Analysis of the msl2msl3,  
691 crl, and ggps1 Mutants Indicates that Diverse Sources of Plastid Dysfunction Do Not Alter Leaf  
692 Morphology Through a Common Signaling Pathway. *Frontiers in Plant Science* **6**, 1148.

693 **Lundquist, P. K., Rosar, C., Brautigam, A. and Weber, A. P.** (2014). Plastid signals and the bundle  
694 sheath: mesophyll development in reticulate mutants. *Molecular Plant* **7**, 14-29.

695 **Mattioli, R., Marchese, D., D'Angeli, S., Altamura, M. M., Costantino, P. and Trovato, M.** (2008).  
696 Modulation of intracellular proline levels affects flowering time and inflorescence architecture in  
697 Arabidopsis. *Plant Molecular Biology* **66**, 277-288.

698 **Michniewicz, M., Frick, E. M. and Strader, L. C.** (2015). Gateway-compatible tissue-specific vectors  
699 for plant transformation. *BMC Res Notes* **8**, 63.

- 700 **Moschopoulos, A., Derbyshire, P. and Byrne, M. E.** (2012). The Arabidopsis organelle-localized  
701 glycyl-tRNA synthetase encoded by EMBRYO DEFECTIVE DEVELOPMENT1 is required for  
702 organ patterning. *Journal of Experimental Botany* **63**, 5233-5243.
- 703 **Myouga, F., Hosoda, C., Umezawa, T., Iizumi, H., Kuromori, T., Motohashi, R., Shono, Y., Nagata,**  
704 **N., Ikeuchi, M. and Shinozaki, K.** (2008). A heterocomplex of iron superoxide dismutases  
705 defends chloroplast nucleoids against oxidative stress and is essential for chloroplast  
706 development in Arabidopsis. *The Plant Cell* **20**, 3148-3162.
- 707 **Neff, M. M., Neff, J. D., Chory, J. and Pepper, A. E.** (1998). dCAPS, a simple technique for the  
708 genetic analysis of single nucleotide polymorphisms: experimental applications in Arabidopsis  
709 thaliana genetics. *The Plant Journal* **14**, 387-392.
- 710 **Neuhaus, H. E. and Emes, M. J.** (2000). Nonphotosynthetic Metabolism in Plastids. *Annu Rev Plant*  
711 *Physiol Plant Mol Biol* **51**, 111-140.
- 712 **Perianez-Rodriguez, J., Manzano, C. and Moreno-Risueno, M. A.** (2014). Post-embryonic  
713 organogenesis and plant regeneration from tissues: two sides of the same coin? *Frontiers in*  
714 *Plant Science* **5**, 219.
- 715 **Raggi, S., Ferrarini, A., Delledonne, M., Dunand, C., Ranocha, P., De Lorenzo, G., Cervone, F.**  
716 **and Ferrari, S.** (2015). The Arabidopsis Class III Peroxidase AtPRX71 Negatively Regulates  
717 Growth under Physiological Conditions and in Response to Cell Wall Damage. *Plant*  
718 *Physiology* **169**, 2513-2525.
- 719 **Ramel, F., Birtic, S., Ginies, C., Soubigou-Taconnat, L., Triantaphylides, C. and Havaux, M.**  
720 (2012). Carotenoid oxidation products are stress signals that mediate gene responses to  
721 singlet oxygen in plants. *Proceedings of the National Academy of Sciences of the United*  
722 *States of America* **109**, 5535-5540.
- 723 **Schaller, G. E., Bishopp, A. and Kieber, J. J.** (2015). The yin-yang of hormones: cytokinin and auxin  
724 interactions in plant development. *The Plant Cell* **27**, 44-63.
- 725 **Schoof, H., Lenhard, M., Haecker, A., Mayer, K. F., Jurgens, G. and Laux, T.** (2000). The stem cell  
726 population of Arabidopsis shoot meristems is maintained by a regulatory loop between the  
727 CLAVATA and WUSCHEL genes. *Cell* **100**, 635-644.
- 728 **Schuster, C., Gaillochet, C., Medzihradszky, A., Busch, W., Daum, G., Krebs, M., Kehle, A. and**  
729 **Lohmann, J. U.** (2014). A regulatory framework for shoot stem cell control integrating  
730 metabolic, transcriptional, and phytohormone signals. *Developmental Cell* **28**, 438-449.
- 731 **Schwartz, S. H., Leon-Kloosterziel, K. M., Koornneef, M. and Zeevaart, J. A.** (1997). Biochemical  
732 characterization of the aba2 and aba3 mutants in Arabidopsis thaliana. *Plant Physiology* **114**,  
733 161-166.

- Scofield, S., Dewitte, W., Nieuwland, J. and Murray, J. A.** (2013). The Arabidopsis homeobox gene SHOOT MERISTEMLESS has cellular and meristem-organisational roles with differential requirements for cytokinin and CYCD3 activity. *The Plant Journal* **75**, 53-66.
- Sharma, S. and Verslues, P. E.** (2010). Mechanisms independent of abscisic acid (ABA) or proline feedback have a predominant role in transcriptional regulation of proline metabolism during low water potential and stress recovery. *Plant, Cell & Environment* **33**, 1838-1851.
- Skirycz, A., Claeys, H., De Bodt, S., Oikawa, A., Shinoda, S., Andriankaja, M., Maleux, K., Eloy, N. B., Coppens, F., Yoo, S. D., et al.** (2011). Pause-and-stop: the effects of osmotic stress on cell proliferation during early leaf development in Arabidopsis and a role for ethylene signaling in cell cycle arrest. *The Plant Cell* **23**, 1876-1888.
- Skoog, F. and Miller, C. O.** (1957). Chemical regulation of growth and organ formation in plant tissues cultured in vitro. *Symp Soc Exp Biol* **11**, 118-130.
- Sugimoto, K., Gordon, S. P. and Meyerowitz, E. M.** (2011). Regeneration in plants and animals: dedifferentiation, transdifferentiation, or just differentiation? *Trends Cell Biol* **21**, 212-218.
- Sun, X., Feng, P., Xu, X., Guo, H., Ma, J., Chi, W., Lin, R., Lu, C. and Zhang, L.** (2011). A chloroplast envelope-bound PHD transcription factor mediates chloroplast signals to the nucleus. *Nat Commun* **2**, 477.
- Sunkar, R., Kapoor, A. and Zhu, J. K.** (2006). Posttranscriptional induction of two Cu/Zn superoxide dismutase genes in Arabidopsis is mediated by downregulation of miR398 and important for oxidative stress tolerance. *The Plant Cell* **18**, 2051-2065.
- Szabados, L. and Savoure, A.** (2010). Proline: a multifunctional amino acid. *Trends Plant Sci* **15**, 89-97.
- Szekely, G., Abraham, E., Cseplo, A., Rigo, G., Zsigmond, L., Csiszar, J., Ayaydin, F., Strizhov, N., Jasik, J., Schmelzer, E., et al.** (2008). Duplicated P5CS genes of Arabidopsis play distinct roles in stress regulation and developmental control of proline biosynthesis. *The Plant Journal* **53**, 11-28.
- Tameshige, T., Fujita, H., Watanabe, K., Toyokura, K., Kondo, M., Tatematsu, K., Matsumoto, N., Tsugeki, R., Kawaguchi, M., Nishimura, M., et al.** (2013). Pattern dynamics in adaxial-abaxial specific gene expression are modulated by a plastid retrograde signal during Arabidopsis thaliana leaf development. *PLoS Genet* **9**, e1003655.
- To, J. P., Deruere, J., Maxwell, B. B., Morris, V. F., Hutchison, C. E., Ferreira, F. J., Schaller, G. E. and Kieber, J. J.** (2007). Cytokinin regulates type-A Arabidopsis Response Regulator activity and protein stability via two-component phosphorelay. *The Plant Cell* **19**, 3901-3914.

767 **To, J. P., Haberer, G., Ferreira, F. J., Deruere, J., Mason, M. G., Schaller, G. E., Alonso, J. M.,**  
768 **Ecker, J. R. and Kieber, J. J. (2004).** Type-A Arabidopsis response regulators are partially  
769 redundant negative regulators of cytokinin signaling. *The Plant Cell* **16**, 658-671.

770 **Ueguchi, C., Koizumi, H., Suzuki, T. and Mizuno, T. (2001).** Novel family of sensor histidine kinase  
771 genes in Arabidopsis thaliana. *Plant & Cell Physiology* **42**, 231-235.

772 **Veley, K. M., Marshburn, S., Clure, C. E. and Haswell, E. S. (2012).** Mechanosensitive channels  
773 protect plastids from hypoosmotic stress during normal plant growth. *Current Biology : CB* **22**,  
774 408-413.

775 **Verslues, P. E. and Sharma, S. (2010).** Proline metabolism and its implications for plant-environment  
776 interaction. *The Arabidopsis book / American Society of Plant Biologists* **8**, e0140.

777 **Wagner, D., Przybyla, D., Op den Camp, R., Kim, C., Landgraf, F., Lee, K. P., Wursch, M., Laloi,**  
778 **C., Nater, M., Hideg, E., et al. (2004).** The genetic basis of singlet oxygen-induced stress  
779 responses of Arabidopsis thaliana. *Science* **306**, 1183-1185.

780 **Wilson, M. E., Basu, M. R., Bhaskara, G. B., Verslues, P. E. and Haswell, E. S. (2014).** Plastid  
781 osmotic stress activates cellular stress responses in Arabidopsis. *Plant Physiology* **165**, 119-  
782 128.

783 **Wilson, M. E., Jensen, G. S. and Haswell, E. S. (2011).** Two mechanosensitive channel homologs  
784 influence division ring placement in Arabidopsis chloroplasts. *The Plant Cell* **23**, 2939-2949.

785 **Woodson, J. D. and Chory, J. (2012).** Organelle signaling: how stressed chloroplasts communicate  
786 with the nucleus. *Current Biology : CB* **22**, R690-692.

787 **Woodson, J. D., Perez-Ruiz, J. M. and Chory, J. (2011).** Heme synthesis by plastid ferrochelatase I  
788 regulates nuclear gene expression in plants. *Current Biology : CB* **21**, 897-903.

789 **Wu, A., Allu, A. D., Garapati, P., Siddiqui, H., Dortay, H., Zanol, M. I., Asensi-Fabado, M. A.,**  
790 **Munne-Bosch, S., Antonio, C., Tohge, T., et al. (2012).** JUNGBRUNNEN1, a reactive  
791 oxygen species-responsive NAC transcription factor, regulates longevity in Arabidopsis. *The*  
792 *Plant Cell* **24**, 482-506.

793 **Wysocka-Diller, J. W., Helariutta, Y., Fukaki, H., Malamy, J. E. and Benfey, P. N. (2000).**  
794 Molecular analysis of SCARECROW function reveals a radial patterning mechanism common  
795 to root and shoot. *Development* **127**, 595-603.

796 **Xiao, Y., Savchenko, T., Baidoo, E. E., Chehab, W. E., Hayden, D. M., Tolstikov, V., Corwin, J. A.,**  
797 **Kliebenstein, D. J., Keasling, J. D. and Dehesh, K. (2012).** Retrograde signaling by the  
798 plastidial metabolite MEcPP regulates expression of nuclear stress-response genes. *Cell* **149**,  
799 1525-1535.

800 **Yamada, H., Suzuki, T., Terada, K., Takei, K., Ishikawa, K., Miwa, K., Yamashino, T. and Mizuno,**  
801 **T.** (2001). The Arabidopsis AHK4 histidine kinase is a cytokinin-binding receptor that  
802 transduces cytokinin signals across the membrane. *Plant & Cell Physiology* **42**, 1017-1023.

803 **Zhang, Z. W., Feng, L. Y., Cheng, J., Tang, H., Xu, F., Zhu, F., Zhao, Z. Y., Yuan, M., Chen, Y. E.,**  
804 **Wang, J. H., et al.** (2013). The roles of two transcription factors, ABI4 and CBFA, in ABA and  
805 plastid signalling and stress responses. *Plant Molecular Biology* **83**, 445-458.

806 **Zhao, Z., Andersen, S. U., Ljung, K., Dolezal, K., Miotk, A., Schultheiss, S. J. and Lohmann, J. U.**  
807 (2010). Hormonal control of the shoot stem-cell niche. *Nature* **465**, 1089-1092.

808 **Zurcher, E., Tavor-Deslex, D., Lituiev, D., Enkerli, K., Tarr, P. T. and Muller, B.** (2013). A robust  
809 and sensitive synthetic sensor to monitor the transcriptional output of the cytokinin signaling  
810 network in planta. *Plant Physiology* **161**, 1066-1075.

811  
812



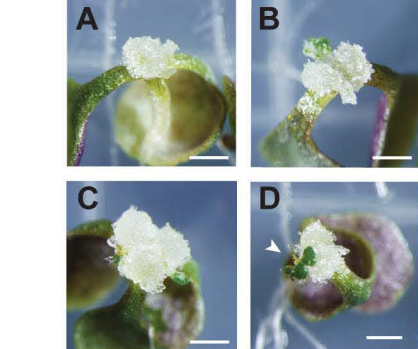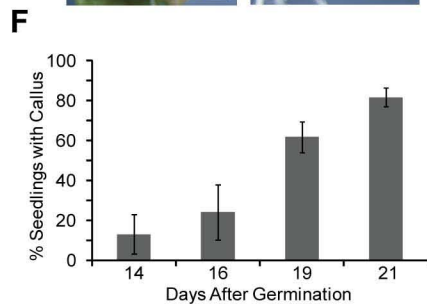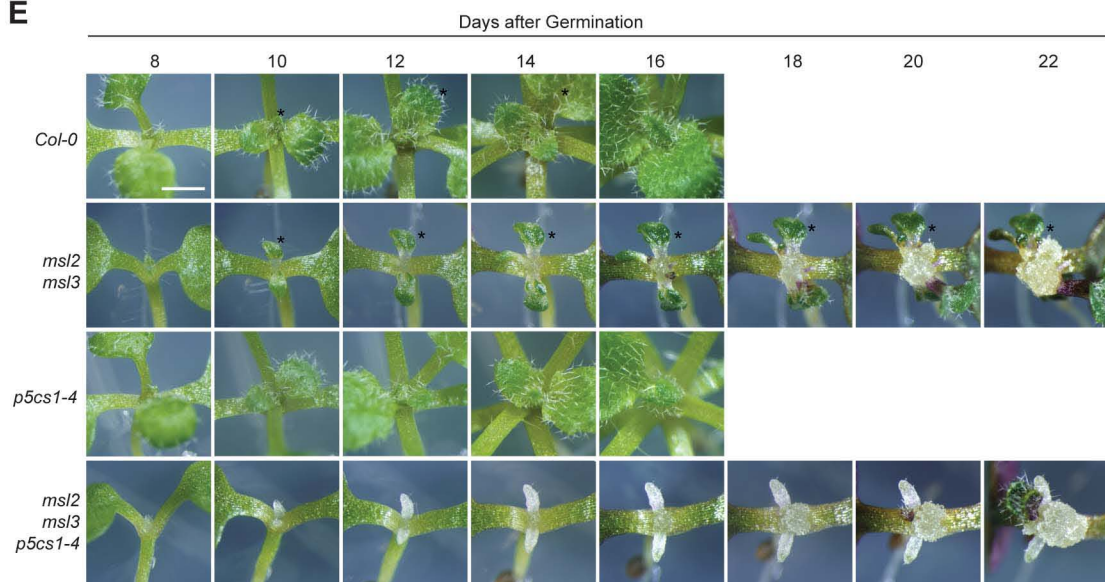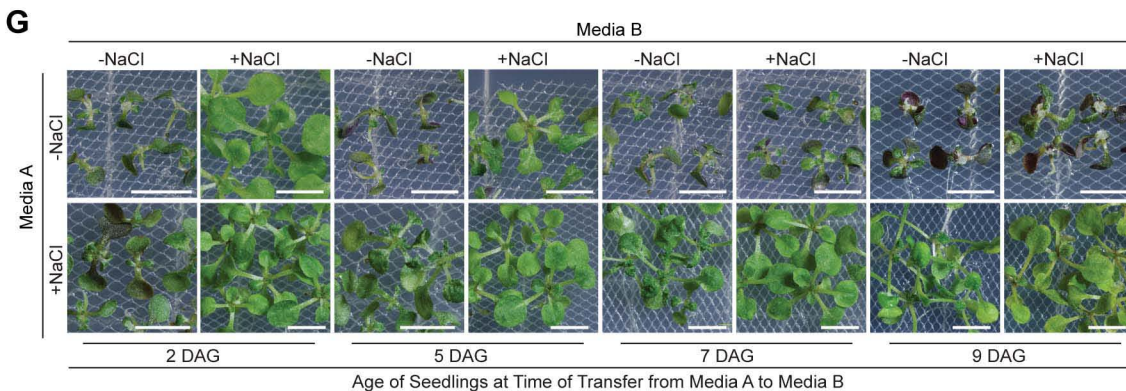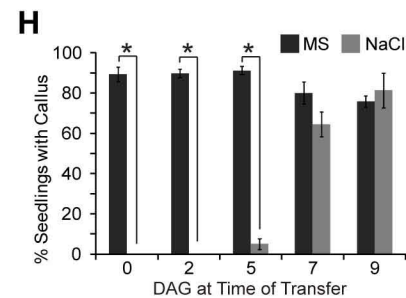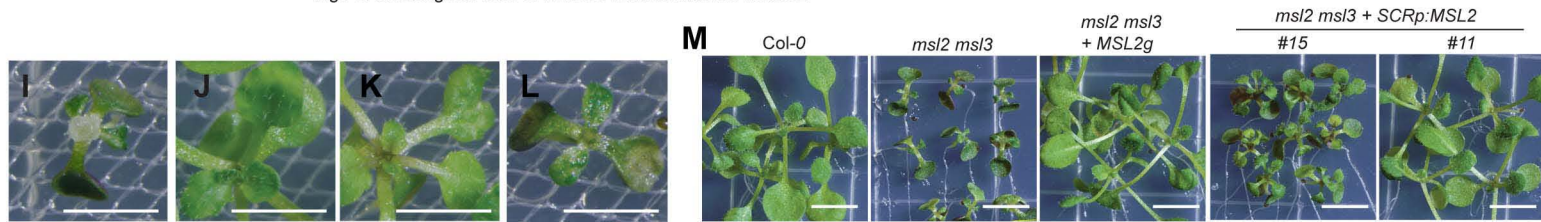



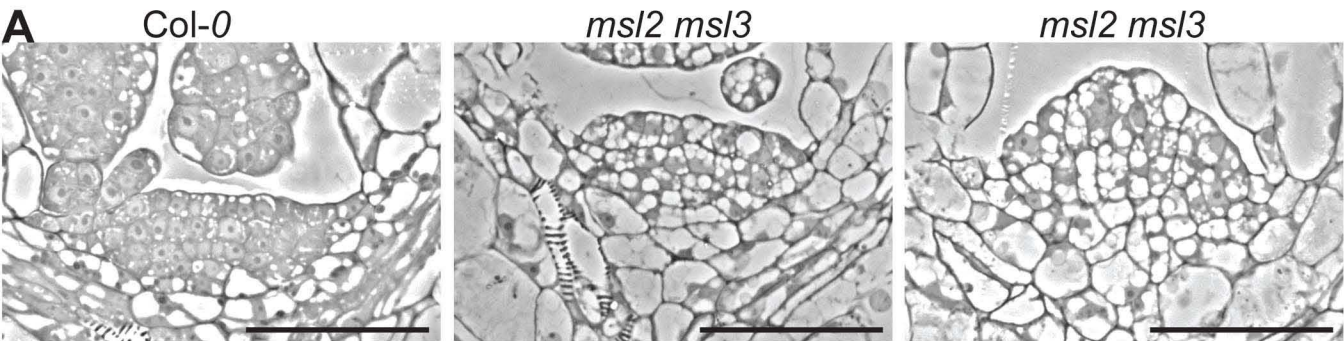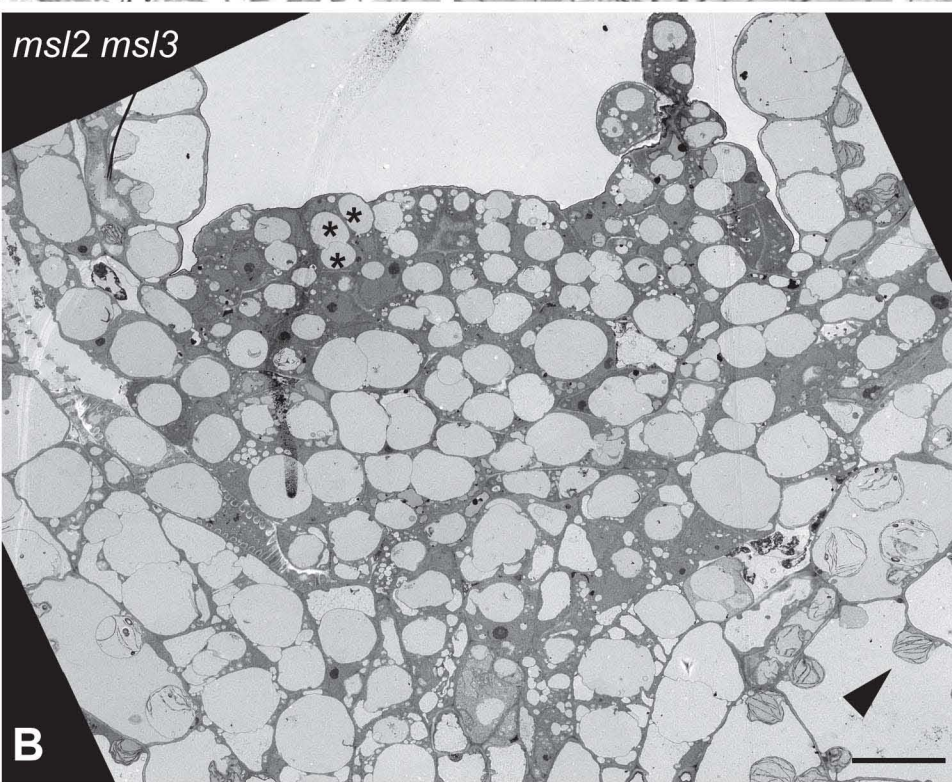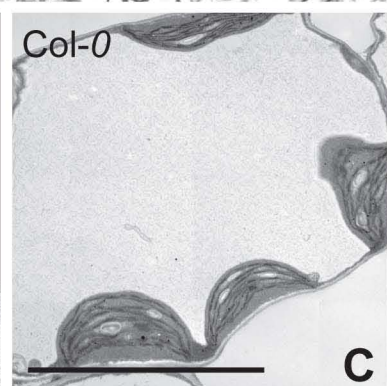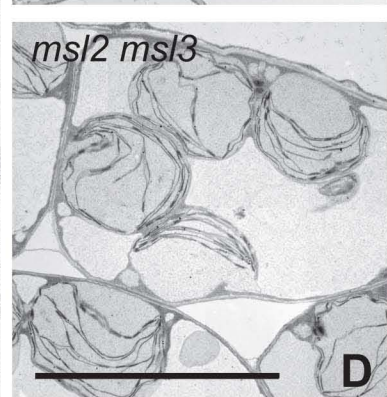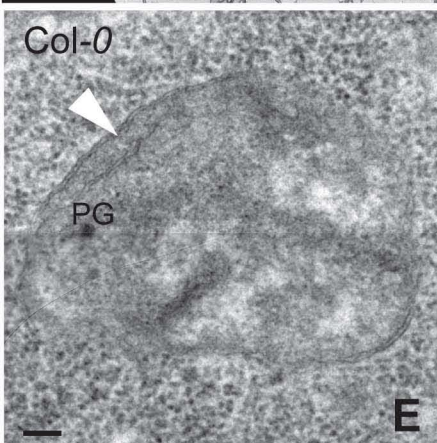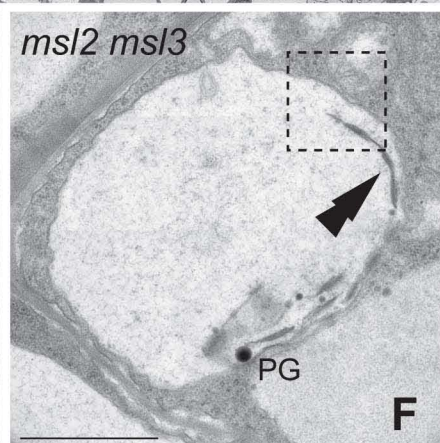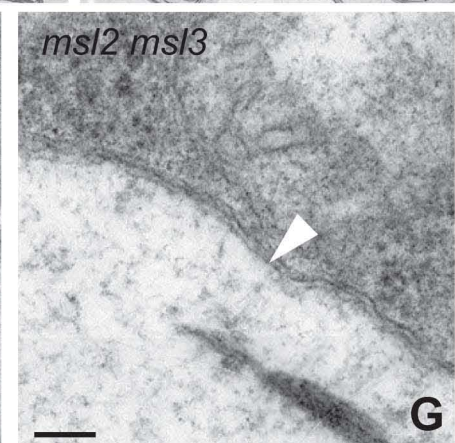

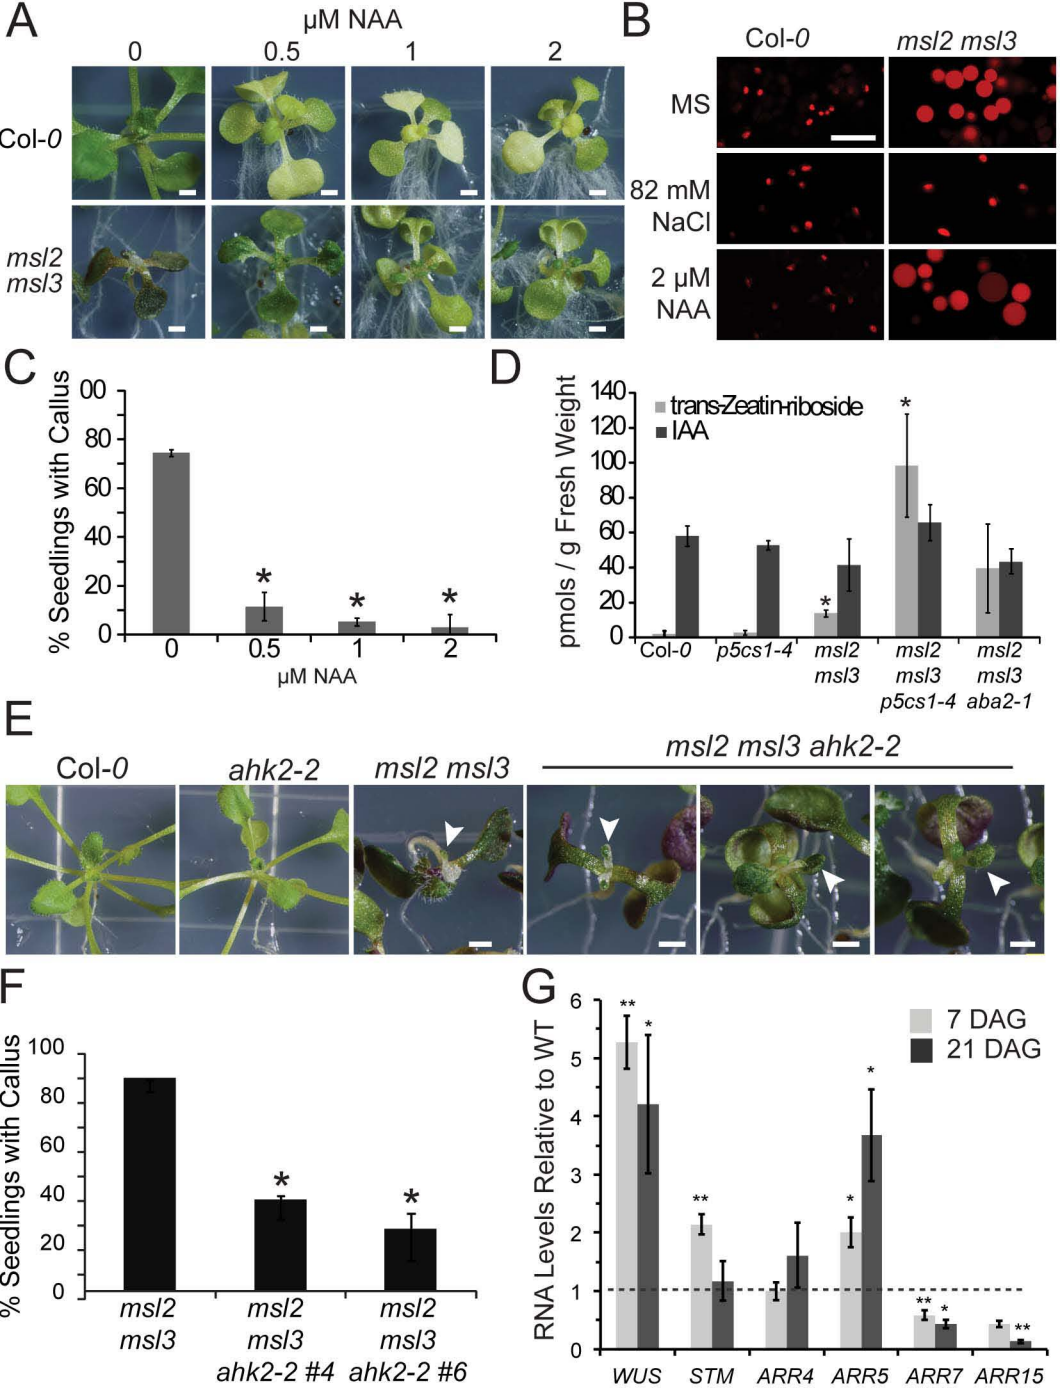



**A**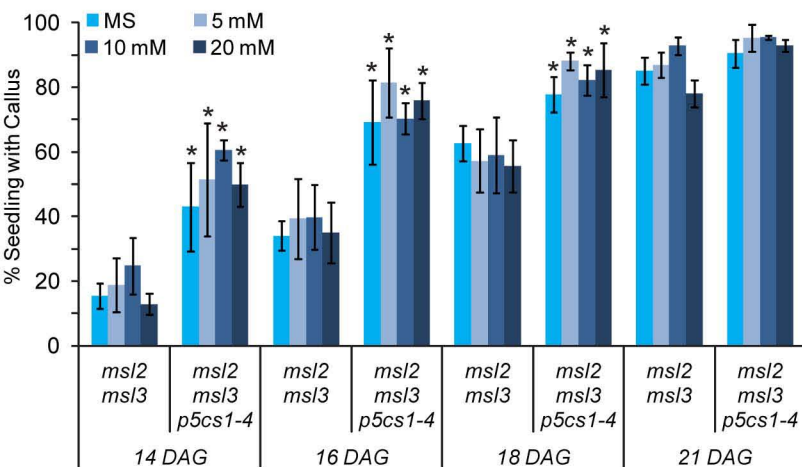**B**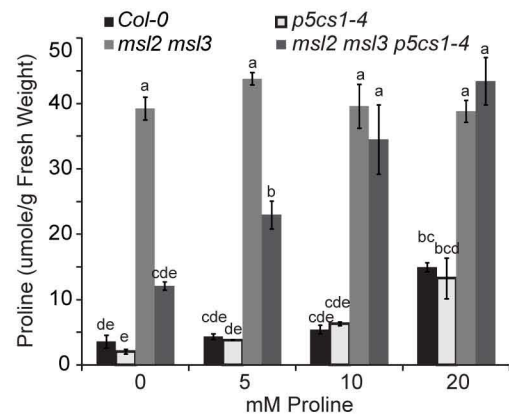**C**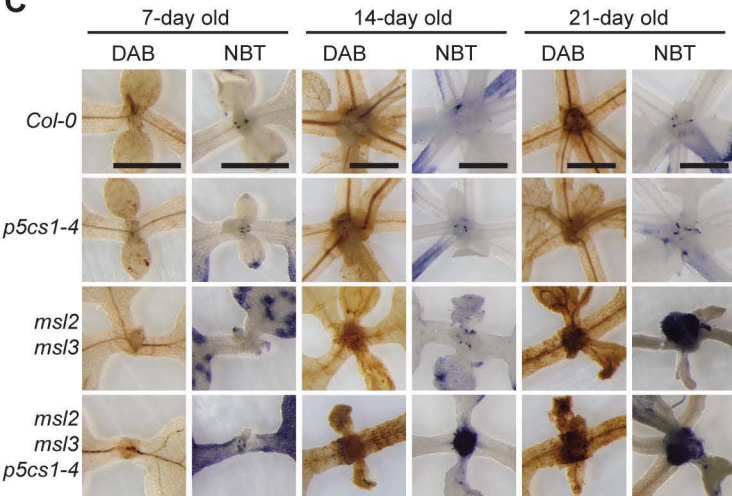**D**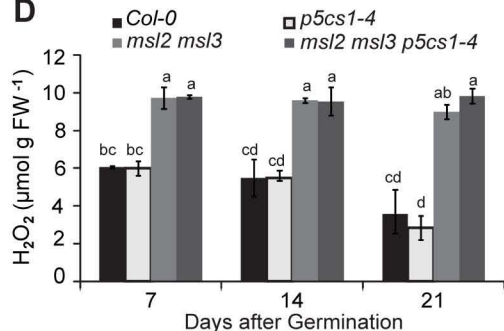**E**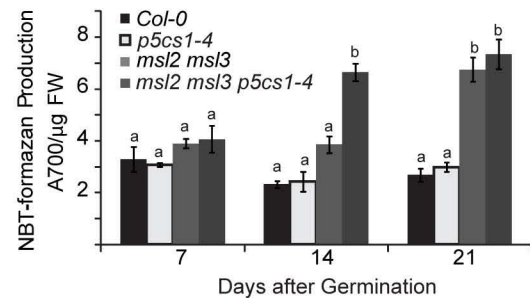

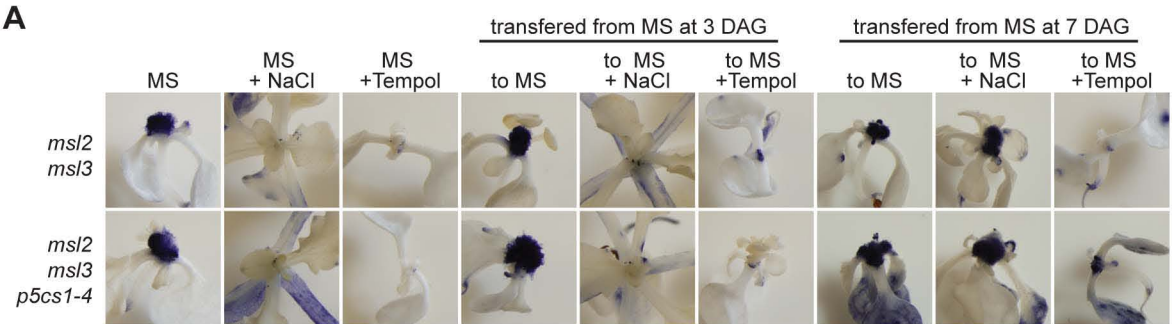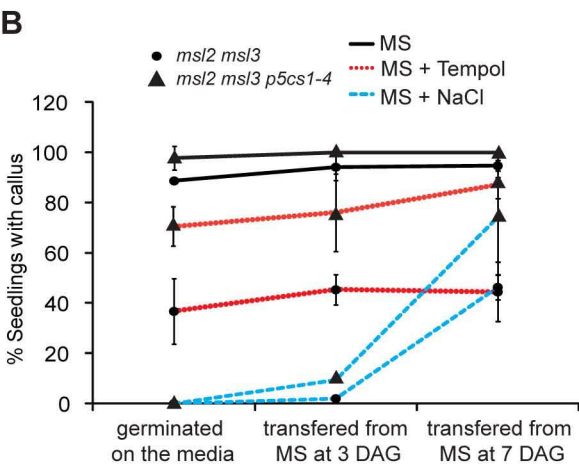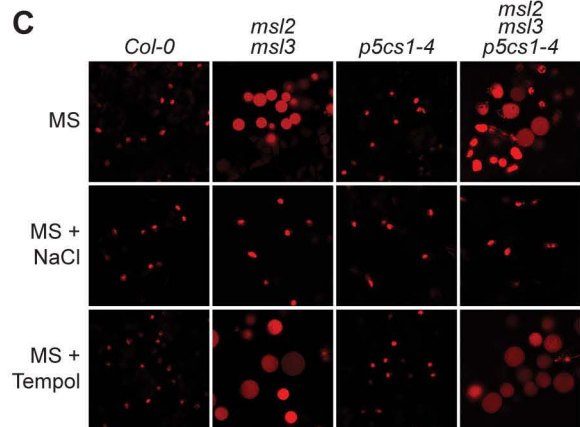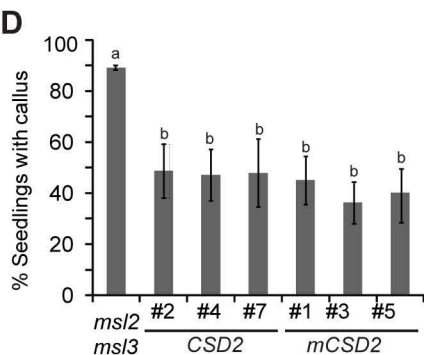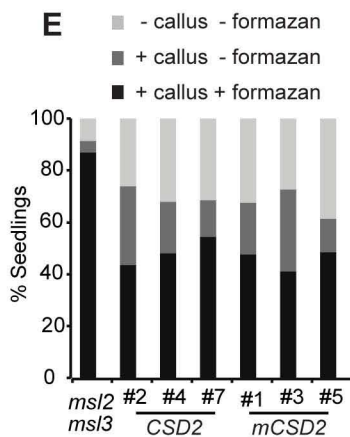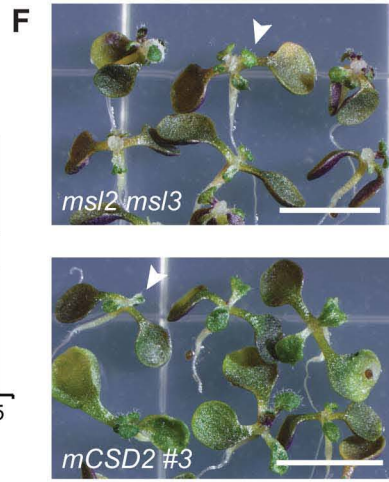

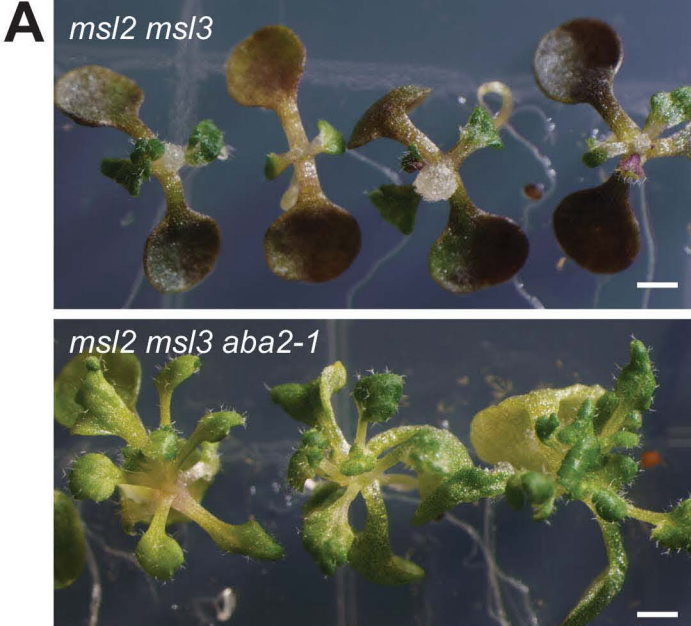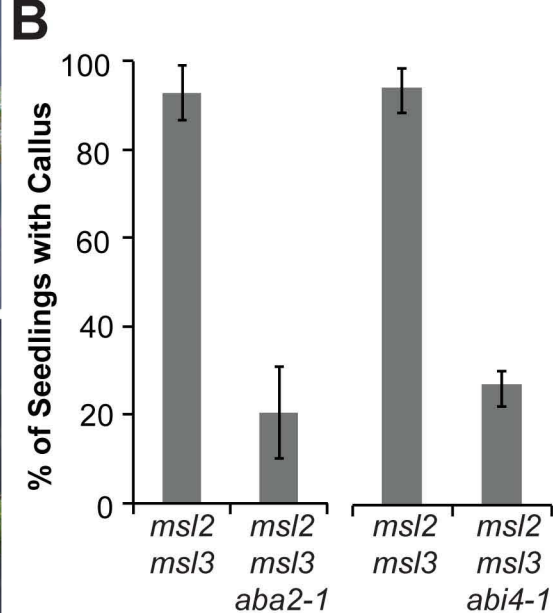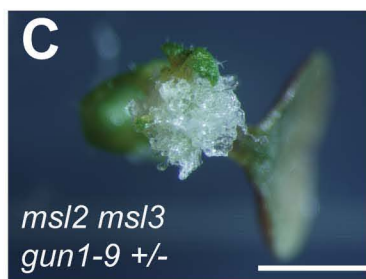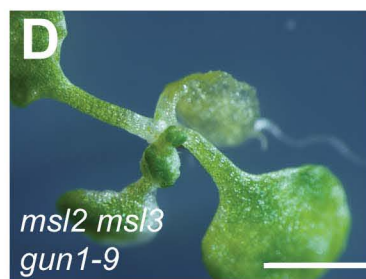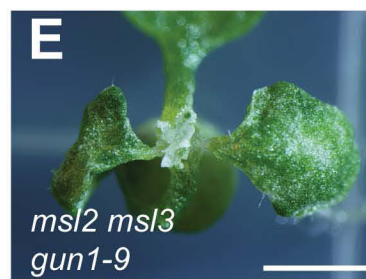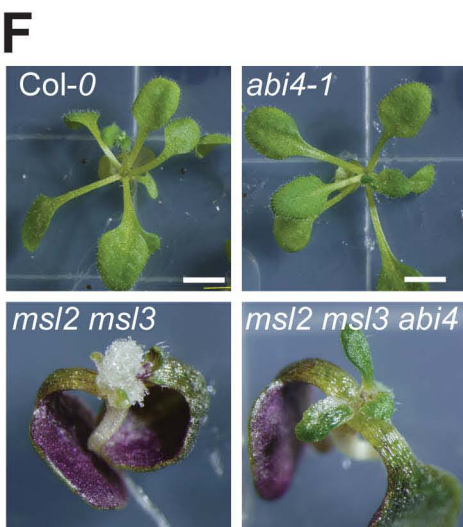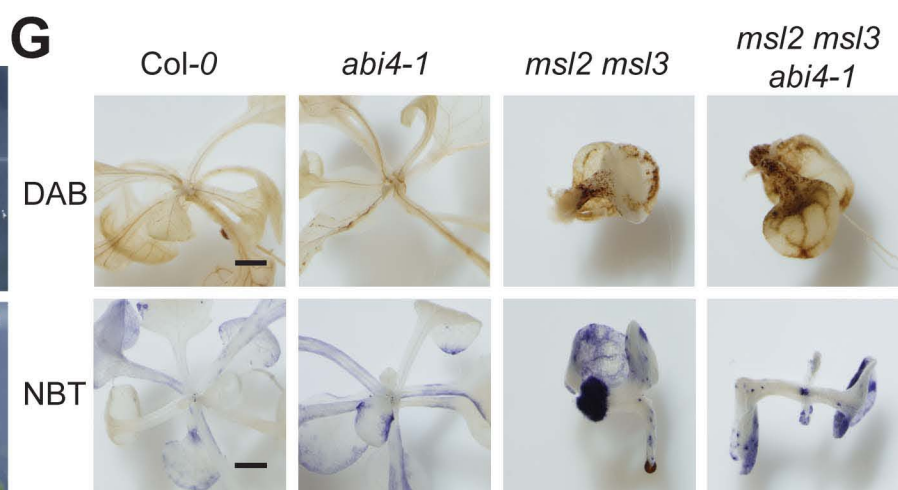

# SUPPLEMENTARY FIGURE LEGENDS

**Fig. S1. Additional analysis of callus production in *msl2 mls3* mutant seedlings.** (A) Callus production is suppressed in *msl2 msl3* seedlings grown on MS supplemented with various osmotica. Top, percent of seedlings with visible apical callus after 3 weeks of growth on the indicated media. Bottom, individual seedling images. Scale bars are 5 mm. (B) *msl2 msl3* seedlings develop abnormal leaves after transfer from media containing osmotica to media without added osmotica. Bright field images of 21-day-old seedlings transferred at the indicated time points. Leaf notching is indicated by the white arrowheads.

**Fig. S2. Additional transmission electron microscope (TEM) images of developing proplastids** in the shoot apical meristem of 4-day-old wild type (A) and *msl2 msl3* mutants (B-D) seedlings. Size bar = 1  $\mu$ m (A and C). (B) Proplastids are indicated (\*), size bar = 10  $\mu$ m. (C) Higher magnification images of the three proplastids marked with numbers in (B). Boxes in (C) are further magnified in (D) to show double membranes (white arrowhead). Size bar = 100 nm. Plastoglobules (PG), thylakoids (double black arrows).

**Fig. S3. Characterization of callus production in *msl2 msl3* mutants.** (A) Etiolated hypocotyl explants cultured on MS media containing the indicated concentrations of auxin (NAA) and cytokinin (kinetin). (B) Quantitative RT-PCR analysis of transcript levels of genes involved in callus production pathways in *msl2 msl3* mutants compared to the wild type. The average of three biological replicates (two technical replicates;  $n \geq 25$  seedlings each) is presented. Error bars indicate SEM, \*\* $P < 0.01$ , \* $P < 0.05$  (Student's *t*-test).

**Fig. S4. Two *p5cs1* alleles exacerbate callus production in the *msl2 msl3* background.** (A) Bright-field images of 21-day-old *msl2 msl3* and *msl2 msl3 p5cs1-4* mutants. Size bars, 5 mm. (B) Callus production at various time points after germination in *msl2 msl3*, *msl2 msl3 p5cs1-4*, and *msl2 msl3 p5cs1-1* seedlings. 5 plates of seedlings,  $n > 10$  seedlings per plate, were analyzed per time point. (C) Bright-field images of *msl2 msl3 p5cs1-4* and *msl2 msl3 p5cs1-1* triple mutant seedlings at 21 DAG. Size bars, 5 mm.

**Fig. S5. Additional images of *msl2 msl3 gun1-9 +/-* (A) and *msl2 msl3 gun1-9* triple mutant (B) siblings.** Seedlings were grown for 21 days on solid media before imaging. Size bars, 2.5 mm.

35 **Fig. S6. Working model.** These results are consistent with a working model wherein plastid osmotic  
 36 stress impacts both a feedback loop regulating cell proliferation in the SAM (based on (Gaillochet et al.,  
 37 2015) and (Ikeuchi et al., 2013) and a plastid ROS-dependent retrograde signaling pathway (Leon et  
 38 al., 2012). Plastid osmotic stress leads to increased proliferation at the SAM and the production of  
 39 callus through increased CK levels and *WUS* expression and through an unknown nuclear  
 40 transcription program triggered by GUN1, ABA, and ABI4.  
 41



## SUPPLEMENTARY METHODS

**In Vitro Callus Production.** Induction of *in vitro* callus production was performed as previously described (Iwase et al., 2011). Etiolated hypocotyls were excised from mutant and wild type seedlings 4 days after germination. Mutant and wild type explants were cultured for 30 days side-by-side on MS medium supplemented with Gamborg's vitamins, 2% glucose, 0.05% 2-(N-morpholino)ethanesulfonic acid (MES), pH 5.8 with KOH, 0.8% phytoagar, and the indicated concentrations of NAA and kinetin.

**Quantitative RT-PCR.** Quantitative reverse transcription-PCR was performed as previously described (Wilson et al., 2011). Primers used for gene expression analysis of *KPR* and *WIND* genes were previously described (Iwase et al., 2011; Schiessl et al., 2014). The following primer pairs were used to amplify *TDS1* (AGGCACTGCGGAATCTAGCAA and CTGGTCTGATTGTGGAAGGTCG) and *TDS2* (CAGGTCAGCATCTCCTATGTCT and CCAAGATAGTTCTCACACCAGC) and *MAIL1* (CTTGATCCTAGCAAGATCACTTGG and TGCCTCAGACACCTATCTGGA).

## SUPPLEMENTARY REFERENCES

- Gaillochet, C., Daum, G. and Lohmann, J. U.** (2015). O cell, where art thou? The mechanisms of shoot meristem patterning. *Curr Opin Plant Biol* **23**, 91-97.
- Ikeuchi, M., Sugimoto, K. and Iwase, A.** (2013). Plant callus: mechanisms of induction and repression. *The Plant Cell* **25**, 3159-3173.
- Iwase, A., Mitsuda, N., Koyama, T., Hiratsu, K., Kojima, M., Arai, T., Inoue, Y., Seki, M., Sakakibara, H., Sugimoto, K., et al.** (2011). The AP2/ERF transcription factor WIND1 controls cell dedifferentiation in Arabidopsis. *Current Biology : CB* **21**, 508-514.
- Leon, P., Gregorio, J. and Cordoba, E.** (2012). ABI4 and its role in chloroplast retrograde communication. *Frontiers in Plant Science* **3**, 304.
- Schiessl, K., Muino, J. M. and Sablowski, R.** (2014). Arabidopsis JAGGED links floral organ patterning to tissue growth by repressing Kip-related cell cycle inhibitors. *Proceedings of the National Academy of Sciences of the United States of America* **111**, 2830-2835.
- Wilson, M. E., Jensen, G. S. and Haswell, E. S.** (2011). Two mechanosensitive channel homologs influence division ring placement in Arabidopsis chloroplasts. *The Plant Cell* **23**, 2939-2949.

A

% seedlings with apical callus (number of seedlings counted) when grown on the indicated media

|                         | MS               | MS + 82 mM NaCl | MS + 180 mM sucrose | MS + 180 mM mannitol | MS + 180 mM sorbitol |
|-------------------------|------------------|-----------------|---------------------|----------------------|----------------------|
| <b>Col-0</b>            | 0 (186)          | 0 (48)          | 0 (99)              | 0 (61)               | 0 (153)              |
| <b><i>msl2 msl3</i></b> | 88 +/-10.8 (283) | 4 +/- 5.9 (52)  | 5 +/- 1.8 (70)      | 39.1 +/- 16 (55)     | 35 +/- 18 (220)      |

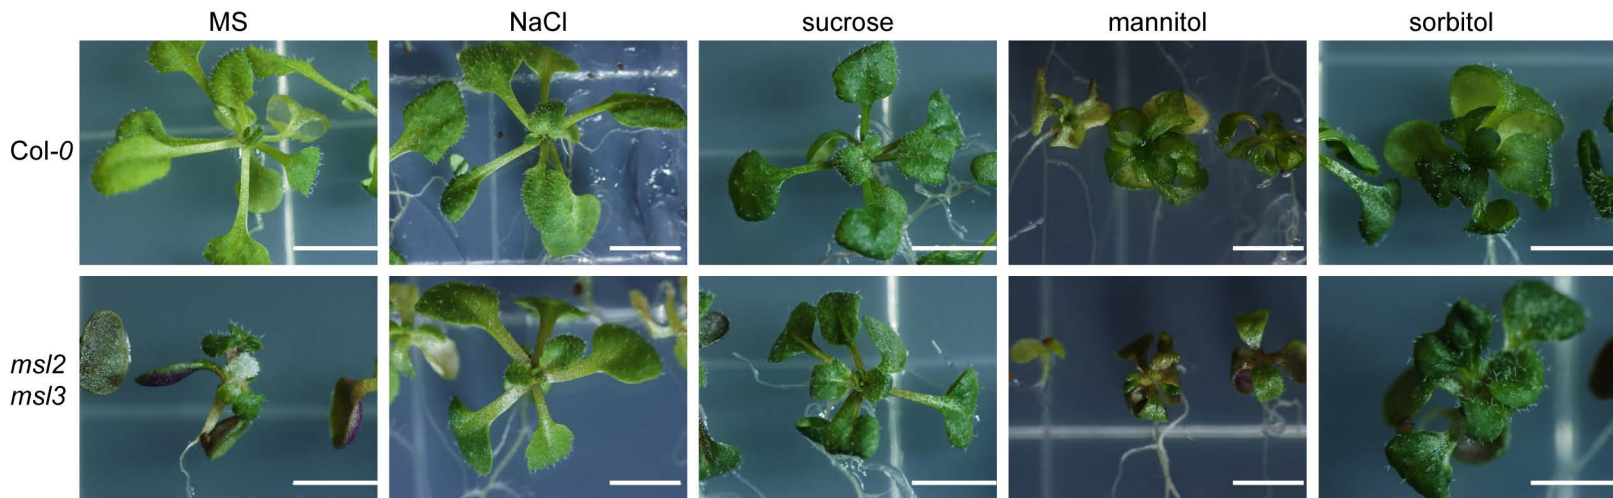

B

Age of seedlings at time of transfer from media +NaCl to media -NaCl

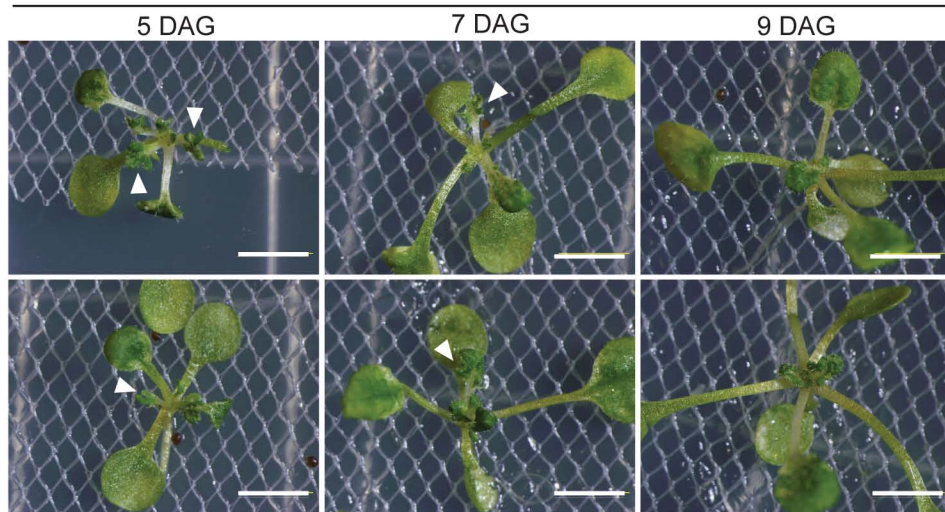

**Fig. S1. Additional analysis of callus production in *msl2 msl3* mutant seedlings.** (A) Callus production is suppressed in *msl2 msl3* seedlings grown on MS supplemented with various osmotica. Top, percent of seedlings with visible apical callus after 3 weeks of growth on the indicated media. Bottom, individual seedling images. Scale bars are 5 mm. (B) *msl2 msl3* seedlings develop abnormal leaves after transfer from media containing osmotica to media without added osmotica. Bright field images of 21-day-old seedlings transferred at the indicated time points. Leaf notching is indicated by the white arrowheads.



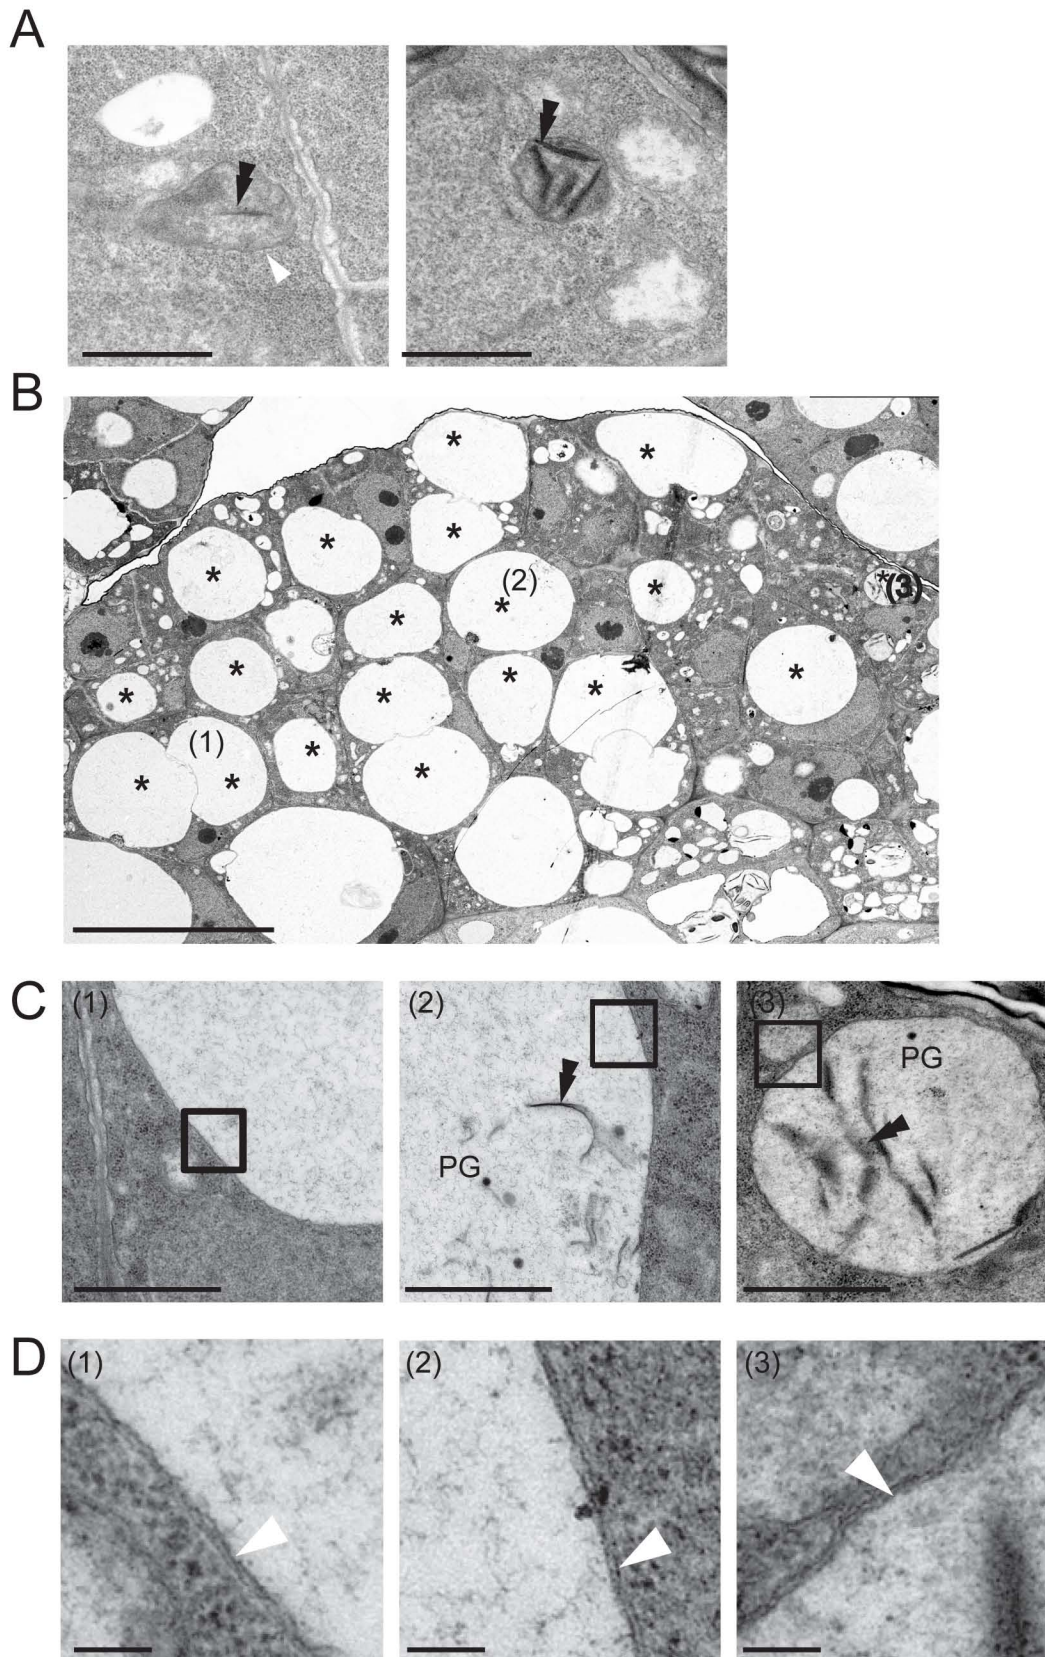

**Fig. S2. Additional transmission electron microscope (TEM) images** of developing proplastids in the shoot apical meristem of 4-day-old wild type (A) and *ms12 ms13* mutants (B-D) seedlings. Size bar = 1 μm (A and C). (B) Proplastids are indicated (\*), size bar = 10 μm. (C) Higher magnification images of the three proplastids marked with numbers in (B). Boxes in (C) are further magnified in (D) to show double membranes (white arrowhead). Size bar = 100 nm. Plastoglobules (PG), thylakoids (double black arrows).



A

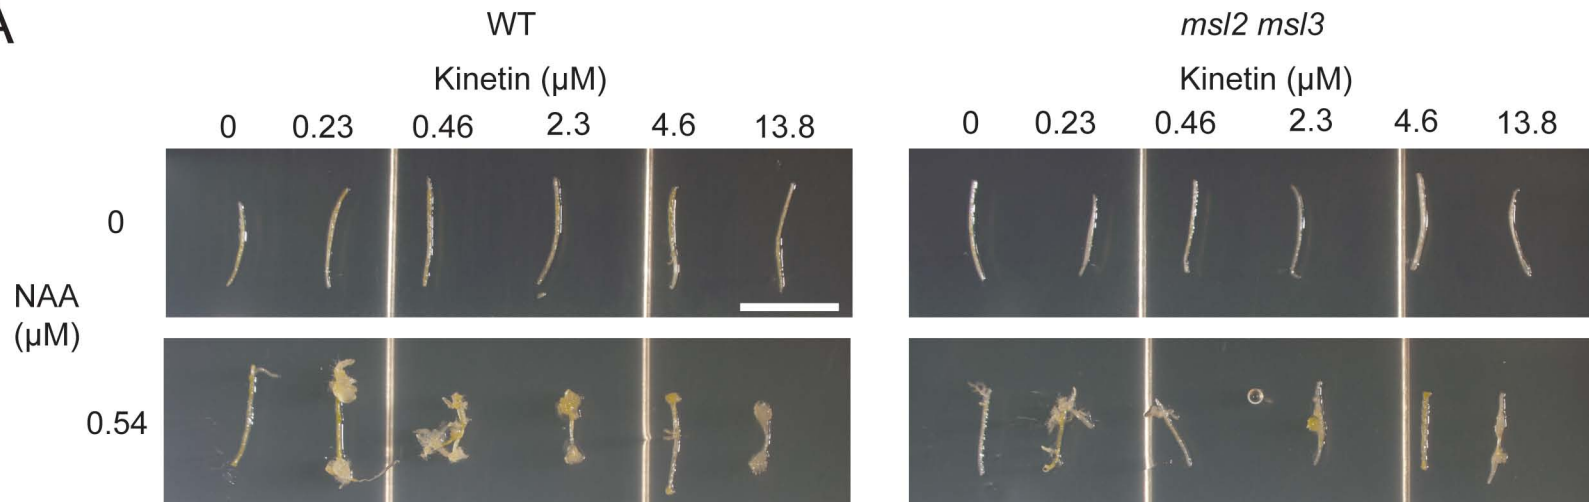

B

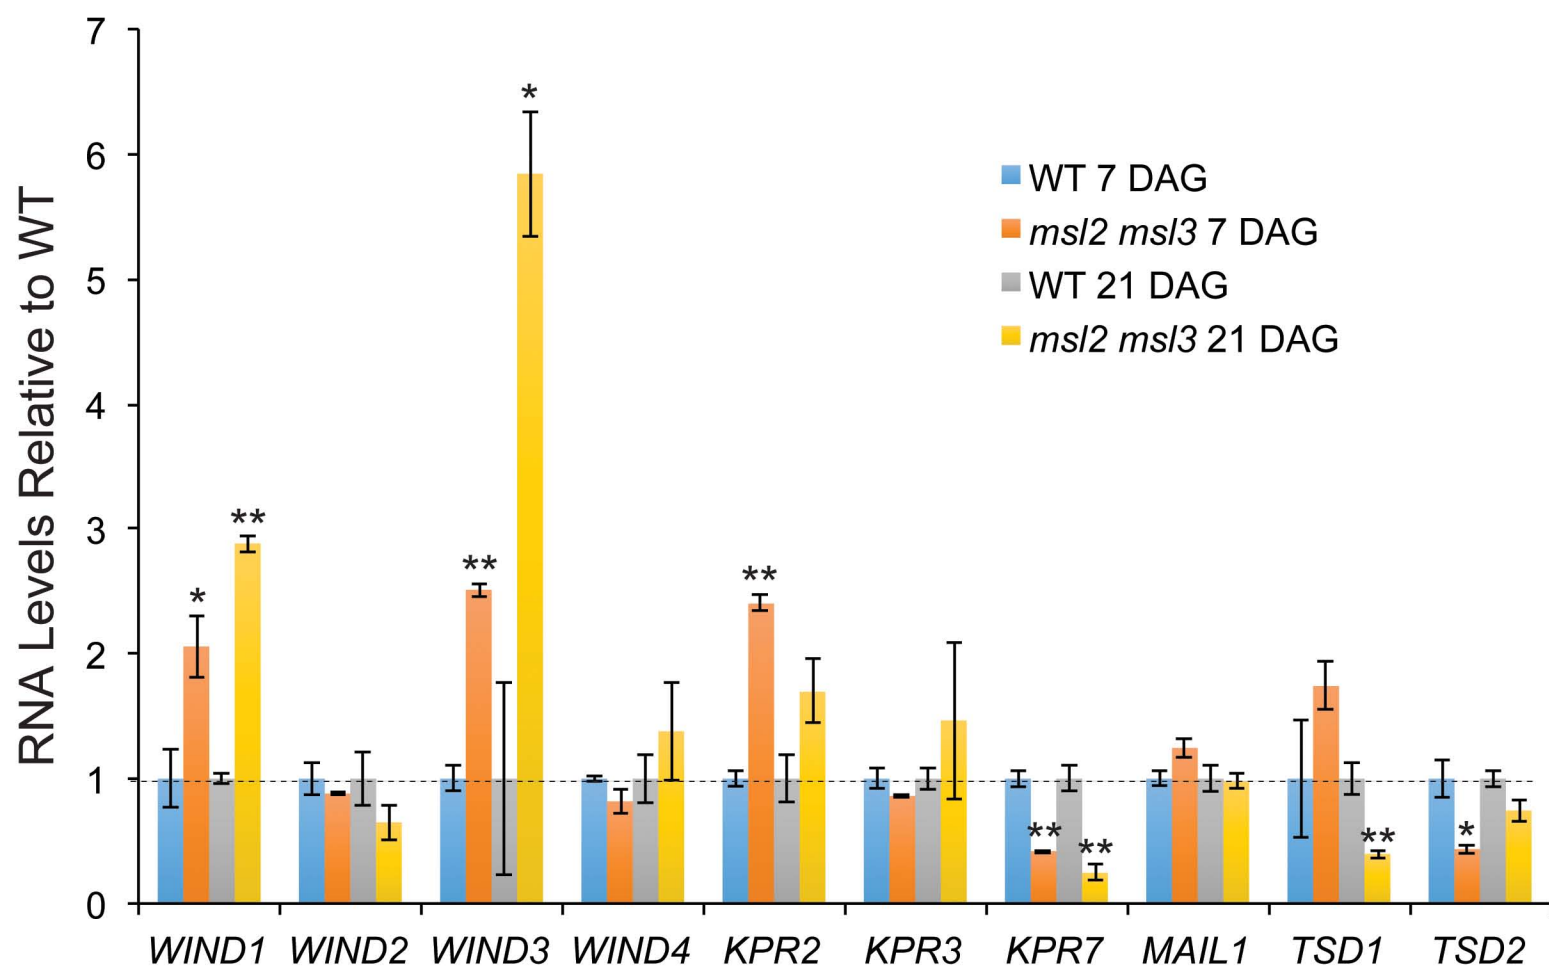

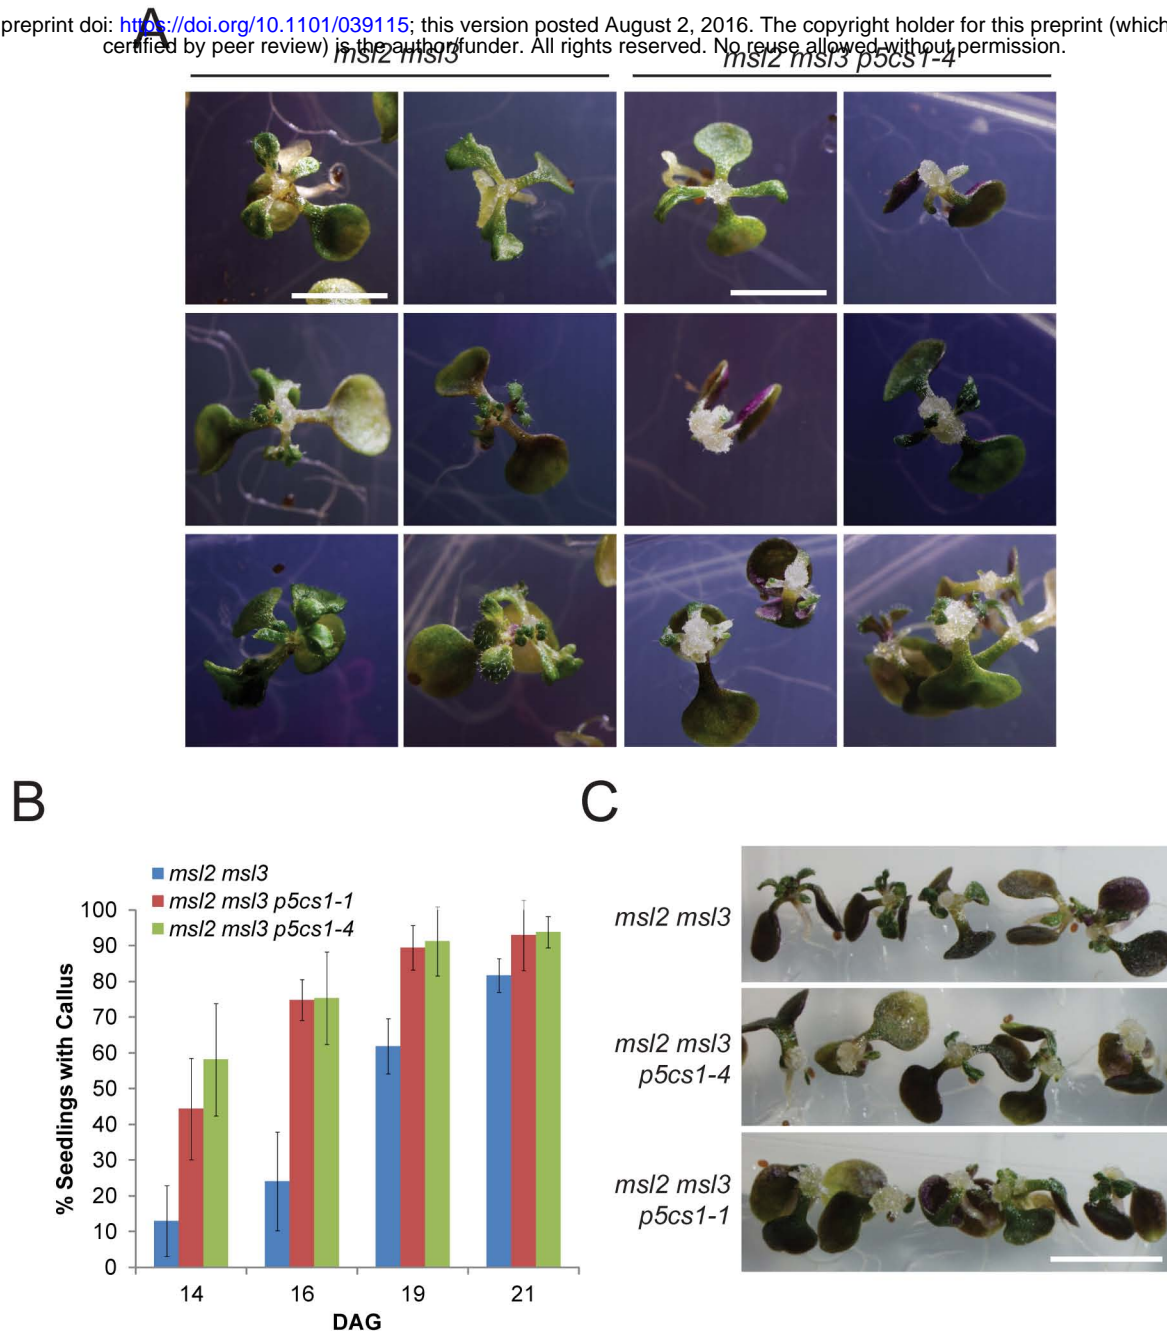

**Fig. S4. Two *p5cs1* alleles exacerbate callus production in the *msl2 msl3* background.** (A) Bright-field images of 21-day-old *msl2 msl3* and *msl2 msl3 p5cs1-4* mutants. Size bars, 5 mm. (B) Callus production at various time points after germination in *msl2 msl3*, *msl2 msl3 p5cs1-4*, and *msl2 msl3 p5cs1-1* seedlings. 5 plates of seedlings,  $n > 10$  seedlings per plate, were analyzed per time point. (C) Bright-field images of *msl2 msl3 p5cs1-4* and *msl2 msl3 p5cs1-1* triple mutant seedlings at 21 DAG. Size bars, 5 mm.

A

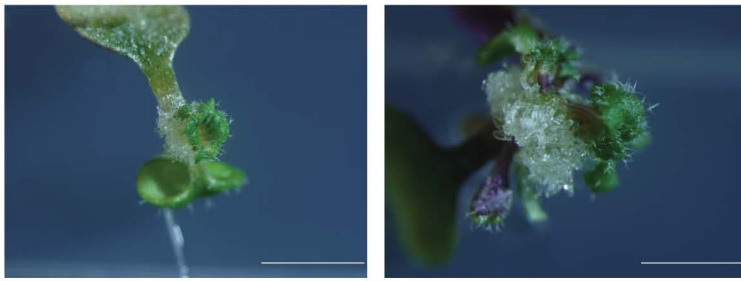

B

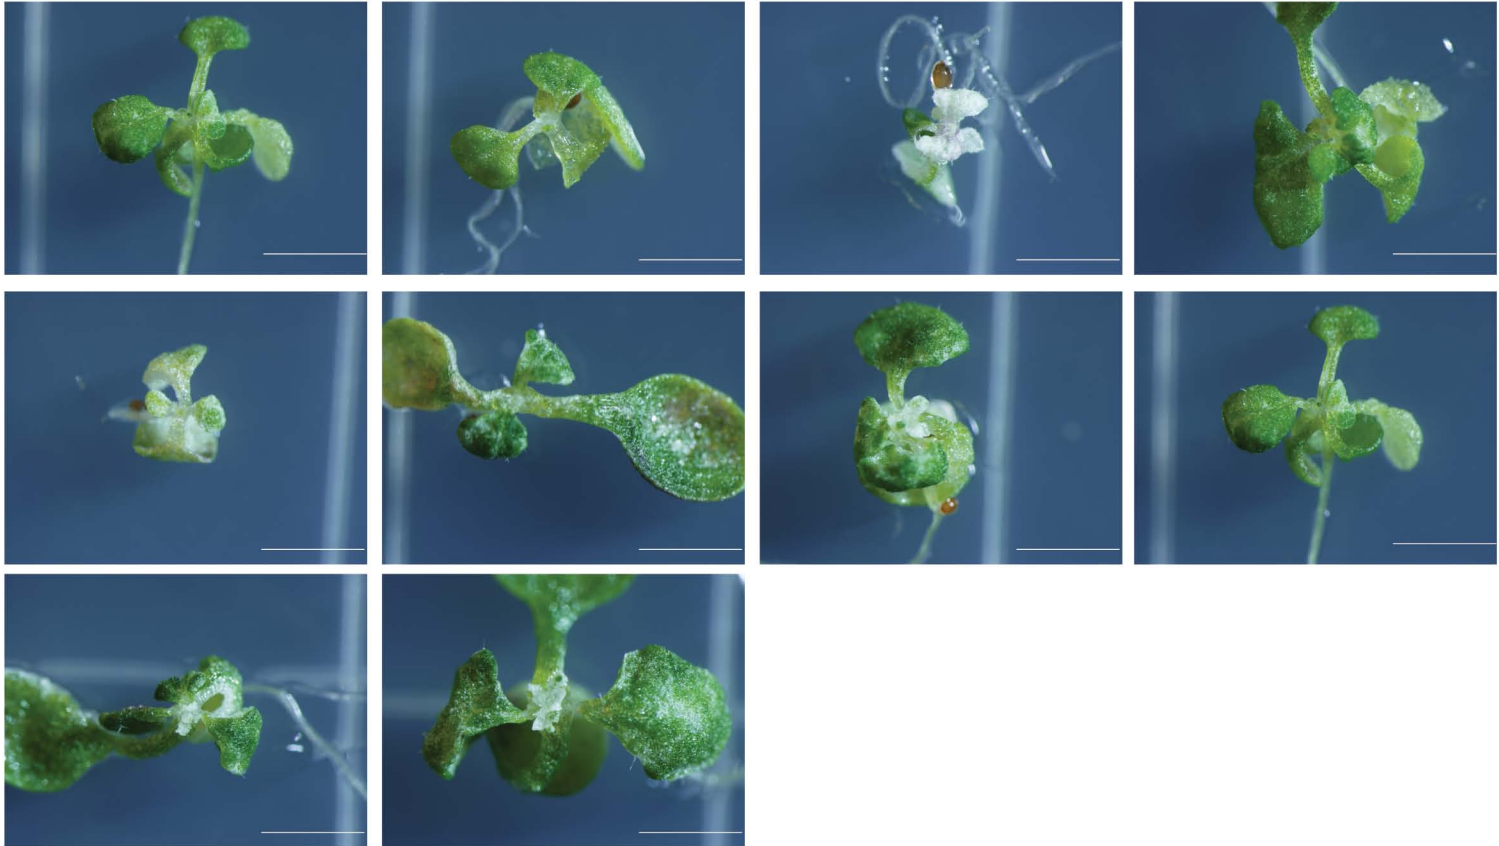

**Fig. S5. Additional images of *msl2 msl3 gun1-9* +/- (A) and *msl2 msl3 gun1-9* triple mutant (B) siblings.** Seedlings were grown for 21 days on solid media before imaging. Size bars, 2.5 mm.

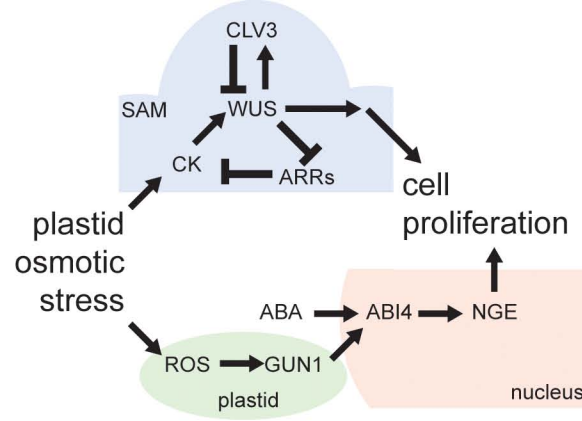

**Fig. S6. Working model.** These results are consistent with a working model wherein plastid osmotic stress impacts both a feedback loop regulating cell proliferation in the SAM (based on (Gaillochet et al., 2015) and a plastid ROS-dependent retrograde signaling pathway (Leon et al., 2012). Plastid osmotic stress leads to increased proliferation at the SAM and the production of callus through increased CK levels and *WUS* expression and through an unknown nuclear transcription program triggered by GUN1, ABA, and ABI4.
